*Comparison of SARS-CoV-2 evolution in vitro during passage in Vero and primary human airway cells*

# 1           **Collaboration Between Host and Viral** 2           **Factors Shape SARS-CoV-2 Evolution**

3  
4 Connor G. G. Bamford<sup>1\*</sup>, Lindsay Broadbent<sup>1</sup>, Elihu Aranday-Cortes<sup>2</sup>, Mary  
5 McCabe<sup>1</sup>, James McKenna<sup>3</sup>, David Courtney<sup>1</sup>, Olivier Touzelet<sup>1</sup>, Ahlam  
6 Ali<sup>1,4</sup>, Grace Roberts<sup>1</sup>, Guillermo Lopez Campos<sup>1</sup>, David Simpson<sup>1</sup>, Conall  
7 McCaughey<sup>3</sup>, Derek Fairley<sup>3</sup>, Ken Mills<sup>4</sup>, Ultan F. Power<sup>1\*</sup>, and the  
8 Breathing Together Investigators<sup>±</sup>

9  
10 <sup>1</sup> Wellcome-Wolfson Institute for Experimental Medicine, Queen's  
11 University Belfast, Belfast, UK.

12 <sup>2</sup> Medical Research Council-University of Glasgow Centre for Virus  
13 Research, University of Glasgow, Glasgow, UK.

14 <sup>3</sup> Regional Virus Laboratory, Belfast Health and Social Care Trust, Belfast,  
15 UK

16 <sup>4</sup> Patrick. G. Johnston Centre for Cancer Research, Queen's University  
17 Belfast, Belfast, UK.

18  
19 \*co-corresponding authors

20  
21 Connor G. G. Bamford email: [c.bamford@qub.ac.uk](mailto:c.bamford@qub.ac.uk)

22 Ultan F. Power email: [u.power@qub.ac.uk](mailto:u.power@qub.ac.uk)

23  
24 **± = Breathing Together investigators:** Professor Andrew Bush,  
25 Professor Adnan Custovic, Professor Peter Ghazal, Dr. Mindy Gore,  
26 Professor Jonathan Grigg, Professor Clare M. Lloyd, Professor Benjamin  
27 Marsland, Professor Ultan Power, Professor Graham Roberts, Professor  
28 Sejal Saglani, Professor Jurgen Schwarze, Professor Mike Shields, and  
29 Professor Steve Turner.

*Comparison of SARS-CoV-2 evolution in vitro during passage in Vero and primary human airway cells*

31  
32  
33  
34  
35  
36  
37  
38  
39  
40  
41  
42  
43  
44  
45  
46  
47  
48  
49  
50  
51  
52  
53  
54  
55  
56  
57  
58  
59

**Abstract**

SARS-CoV-2 continues to evolve, resulting in several ‘variants of concern’ with novel properties. The factors driving SARS-CoV-2 fitness and evolution in the human respiratory tract remain poorly defined. Here, we provide evidence that both viral and host factors co-operate to shape SARS-CoV-2 genotypic and phenotypic change. Through viral whole-genome sequencing, we explored the evolution of two clinical isolates of SARS-CoV-2 during passage in unmodified Vero-derived cell lines and in parallel, in well-differentiated primary nasal epithelial cell (WD-PNEC) cultures. We identify a consistent, rich genetic diversity arising in vitro, variants of which could rapidly rise to near-fixation with 2 passages. Within isolates, SARS-CoV-2 evolution was dependent on host cells, with Vero-derived cells facilitating more profound genetic changes. However, most mutations were not shared between strains. Furthermore, comparison of both Vero-grown isolates on WD-PNECs disclosed marked growth attenuation mapping to the loss of the polybasic cleavage site (PBCS) in Spike while the strain with mutations in NSP12 (T293I), Spike (P812R) and a truncation of ORF7a remained viable in WD-PNECs. Our work highlights the significant genetic plasticity of SARS-CoV-2 while uncovering an influential role for collaboration between viral and host cell factors in shaping viral evolution and fitness in human respiratory epithelium.

## Comparison of SARS-CoV-2 evolution in vitro during passage in Vero and primary human airway cells

60

### Introduction

61 Severe acute respiratory syndrome coronavirus 2 (SARS-CoV-2)  
62 (Family: *Coronaviridae*; Genus: *Betacoronavirus*) has a positive-sense,  
63 non-segmented, single-stranded RNA genome of ~30,000 nucleotides in  
64 length (**Lu et al., 2020; Wu et al., 2020**). The SARS-CoV-2 genome  
65 encodes at least 29 proteins, expressed from translation of a 5' major  
66 open reading frame (ORF1ab), including Nsp3 and Nsp12 (viral RNA-  
67 dependent RNA polymerase), and a series of nested transcripts at the 3'  
68 terminus, including Spike (S; the viral attachment and fusion  
69 glycoprotein) and ORF7a. SARS-CoV-2 emerged into the human  
70 population in late 2019, causing coronavirus virus disease 2019 (COVID-  
71 19) (**Wang et al., 2020**). Reflecting its likely zoonotic origins, SARS-  
72 CoV-2-like and other SARS-related viruses have been detected and  
73 isolated from horseshoe bats and pangolins from Asia (Boni et al., 2020).  
74 SARS-CoV-2 is a highly transmissible virus with an R0 of up to ~5, and  
75 has a relatively high case mortality rate (~1%), especially pathogenic in  
76 elderly or individuals with co-morbidities (**Cevik et al., 2020**). While safe  
77 and effective vaccines were recently developed (**Krammer, 2020**), there  
78 is a dearth of highly-effective therapeutic interventions, with notable  
79 exceptions such as dexamethasone (**Recovery Group, 2021**).

80 SARS-CoV-2 productively infects the epithelial cells lining the upper  
81 and lower respiratory tract, including those in the nasal cavity and the  
82 alveoli of the lung (**Hou et al., 2020**). By virtue of interaction with Spike,  
83 SARS-CoV-2 exploits host cell protein angiotensin-converting enzyme 2  
84 (ACE2) as its receptor (**Shang et al., 2020**). Additionally, for entry to  
85 occur Spike requires activation by two host proteases, furin and  
86 transmembrane protease serine 2 (TMPRSS2)-like proteases, which  
87 cleave Spike at the S1/S2 boundary between its two subunits (S1 and S2)  
88 and the S2' site in S2 allowing release of the fusion peptide (**Hoffmann**  
89 **et al., 2020**). Following binding to ACE2, a proteolytically-activated Spike

## *Comparison of SARS-CoV-2 evolution in vitro during passage in Vero and primary human airway cells*

90 can fuse the viral envelope with the host cell membrane releasing the  
91 infectious genome into the cytoplasm.

92 Since its initial emergence, SARS-CoV-2 has continued to evolve  
93 and adapt to the human population with several putatively beneficial  
94 mutations arising in Spike, such as D614G and N501Y, that affect Spike  
95 stability and binding to ACE2, and antibody-escape mutations in the  
96 amino-terminal domain (NTD) (**Harvey et al., 2021**). Additionally, loss  
97 of the polybasic cleavage site (PBCS), which is a unique feature of SARS-  
98 CoV-2 and facilitates furin cleavage at the S1/S2 boundary, has been  
99 demonstrated to reduce transmission and virulence of SARS-CoV-2 in  
100 animal models (**Johnson et al., 2021; Peacock et al., 2021**). Together,  
101 these mutations of interest are found in constellations in so-called  
102 'variants of concern' (VOC), which are strains of SARS-CoV-2 with evident  
103 phenotypic differences, such as enhanced transmissibility, pathogenicity,  
104 or reduced sensitivity to antibody-mediated neutralization in humans  
105 (**Harvey et al., 2021**).

106 As SARS-CoV-2 continues to spread, and interventions and vaccines  
107 are being rolled out, there remain significant unknowns as to how SARS-  
108 CoV-2 may adapt further to humans. Knowledge of the genetic and  
109 molecular correlates of this difference in transmissibility is crucial for  
110 understanding of coronavirus pandemic preparedness and inform  
111 strategies for surveillance and control. In vitro models can help  
112 disentangle the factors affecting evolution, identify new ones, and  
113 highlight mutational tolerance. Here, we undertook a side-by-side  
114 comparison of SARS-CoV-2 evolution by whole genome sequencing of two  
115 isolates, grown in parallel in standard Vero-derived cells and human 'well-  
116 differentiated primary nasal epithelial cells' (WD-PNECs), which are a  
117 useful model for probing virus-host interactions in the respiratory tract  
118 (**Guo-Parke et al., 2013; Hou et al., 2020; Villenave et al., 2012**).  
119 Our data demonstrate clear roles of both viral and host cell factors in

## *Comparison of SARS-CoV-2 evolution in vitro during passage in Vero and primary human airway cells*

120 shaping SARS-CoV-2 genetic and functional changes, identifying genetic  
121 features required for efficient infection of primary cells.

122

123

## **Results**

124

### ***Isolation and passage of SARS-CoV-2 in unmodified Vero-derived cells***

126

127 To begin to understand the evolution of SARS-CoV-2 we first  
128 needed to generate characterised stocks of virus (**Fig 1A**). In the first  
129 instance, a low passage isolate (passage 1, P1) of SARS-CoV-2 (England  
130 02/20) was obtained from Public Health England (PHE) and is referred to  
131 as 'PHE'. This stock was from a sample isolated on VeroE6 cells and  
132 represents one of the earliest isolates of SARS-CoV-2 in the UK during the  
133 pandemic. PHE is from clade A and does not contain the D614G  
134 substitution in Spike (**supplementary table 1**)(**Davidson et al., 2020;**  
135 **Holden et al., 2020**). Upon receipt, we carried out a further three  
136 passages on VeroE6 cells passaging at an MOI of 0.001, harvesting stocks  
137 at 96 hpi when extensive cytopathic effect was observed. The PHE strain  
138 grew efficiently, reaching titres of  $>10^6$  pfu/mL (**Fig 1B**) and was  
139 cytopathic, inducing 'webbing' and cell rounding, consistent with previous  
140 reports (data not shown).

141

142 As we wanted to understand the viral factors that may drive  
143 evolution and results obtained from only one isolate may be non-  
144 representative, we next obtained an independent – but comparable –  
145 clinical nasal/pharyngeal swab sample containing SARS-CoV-2, which we  
146 termed BT20.1 (Belfast 06/20). This strain represents an isolate from the  
147 UK's 'first wave' and is a representative of clade B that contains the  
148 D614G mutation in Spike (table 1). Unlike PHE, BT20.1 was isolated on  
standard Vero cells (CCL-81) and passaged to P4 (multiplicity of infection

*Comparison of SARS-CoV-2 evolution in vitro during passage in Vero and primary human airway cells*

149 [MOI]~0.001 and passaged every 3 days). Like PHE, BT20.1 grew  
150 efficiently, reaching titres of  $>10^6$  pfu/mL (**Fig 1B**).

151 Both PHE and BT20.1 formed plaques on standard Vero cells in all  
152 passages (**Fig 1C and D**). Comparison of plaque sizes between P2 and P4  
153 identified differences in plaque size composition following Vero cell  
154 passage. This was most evident for PHE, which became predominantly  
155 large plaques (**Fig 1 E and F**). As observed in the plaque edge, BT20.1  
156 induced consistent cell-to-cell fusion, unlike PHE (**sFig 1 A and B**).

## Comparison of SARS-CoV-2 evolution in vitro during passage in Vero and primary human airway cells

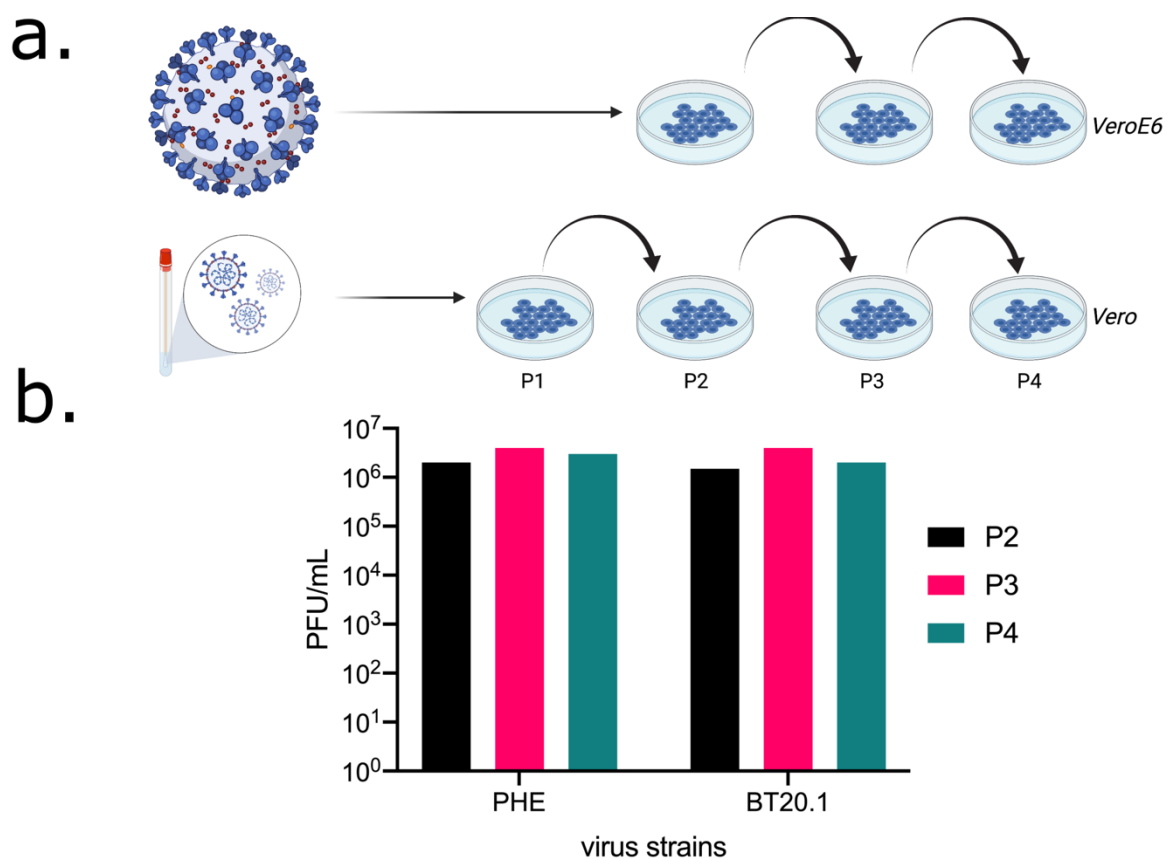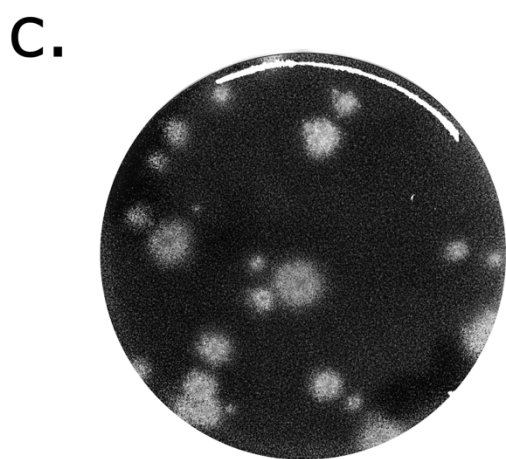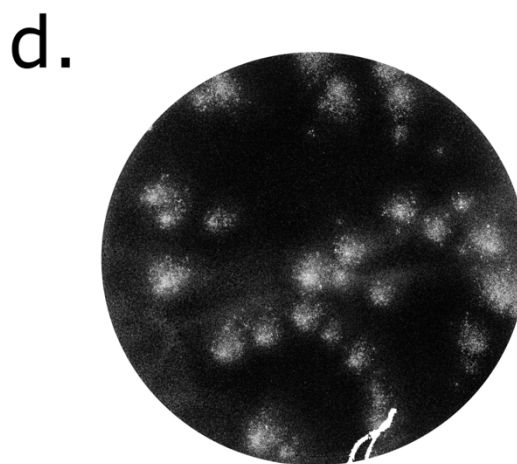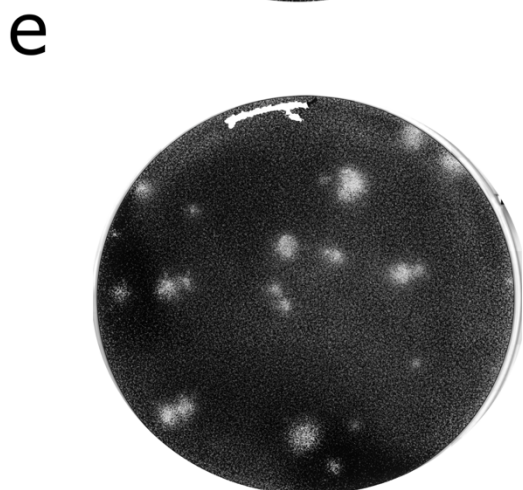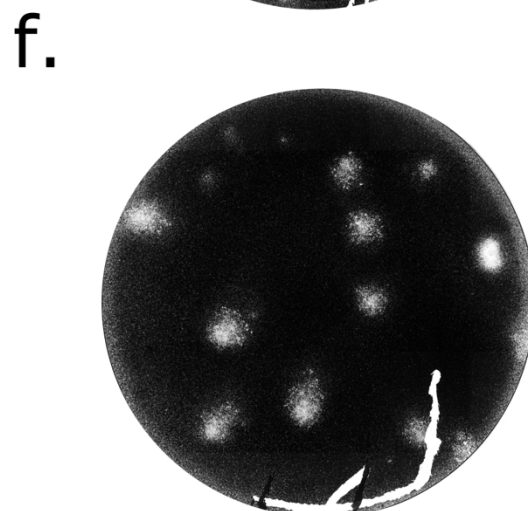

## *Comparison of SARS-CoV-2 evolution in vitro during passage in Vero and primary human airway cells*

158

159 **Figure 1. Isolation and passage of PHE and BT20.1 in Vero-derived cells.**

160 Schematic of SARS-CoV-2 isolation/serial passage series on VeroE6 or Vero cells for PHE  
161 and BT20.1 from isolation to P4 (a). Extracellular infectivity titres for stocks generated  
162 from P2-P4 VeroE6/Vero passage for PHE and BT20.1 using plaque assay protocol on  
163 Vero cells (b). Plaque visualisation of PHE (c) and BT20.1 (d) P4, and P2 (e and f) on  
164 Vero cells. Figures were generated with the aid of Biorender (<https://biorender.com/>).

165

166 **Sequencing of SARS-CoV-2 passage series in unmodified Vero-**  
167 **derived cells**

168 As we had successfully generated comparable in vitro passage  
169 series for two relevant isolates of SARS-CoV-2, we next determined what  
170 genetic changes, if any, occurred during passage in unmodified Vero-  
171 derived cells. Whole genome sequences of our SARS-CoV-2 stocks at each  
172 passage were generated and minor sequence analysis (>5% minor allele  
173 frequency) was carried out, comparing variation arising to the Wuhan-Hu-  
174 1 reference (NC\_045512.2) genome sequence for SARS-CoV-2  
175 (**supplementary table 1**). Unfortunately, the sequence depth and  
176 quality were not sufficient to reconstruct a whole genome sequences for  
177 BT20.1 P1 isolate material, likely due to insufficient viral material  
178 resulting from the initial isolation. Therefore, we focused our analysis on  
179 PHE P1-4 and BT20.1 P2-P4.

180 Analysing mutations in the PHE passage series we identified 4  
181 changes (C8782T; T18488T; T28144C; A29596G) relative to Wuhan-Hu-1  
182 consistently at ~100% at all passages, likely reflecting fixation in the  
183 original virus stock (**Fig 2A**). These changes were considered intrinsic to  
184 that particular strain and were not analysed any further herein as we  
185 wished to focus on variants arising during passage. Sequencing confirmed  
186 the presence of D614 in Spike, consistent with it being an early SARS-  
187 CoV-2 isolate.

188 Outwith the core changes described above, two major mutations  
189 were observed: a synonymous (T23605G) and non-synonymous out-of-  
190 frame deletion (deletion of 24 nucleotides  
191 AATTCTCCTCGGCGGGCACGTAGTG 23597A; resulting in the replacement



## *Comparison of SARS-CoV-2 evolution in vitro during passage in Vero and primary human airway cells*

of of 9 amino acids [679-687; NSPRRARSV] in Spike with an isoleucine [I]) mapping to the polybasic cleavage site (PBCS) (**Fig 2A**). Deletion of the PBCS ablated the T23605G synonymous variant in the process. This occurred at P3, although the deletion was observed in the original P1 material from PHE. Furthermore, we detected 15 minor variants (non-consensus) that had an allele frequency (AF) of >5% in at least one sample of the passage series. These changes mapped to several genes and proteins of SARS-CoV-2, including ORF1AB, Spike, E, N, and ORF10. (**supplementary table 1**). Interestingly, we observed a cluster of three mutations occurring in the amino terminal domain (NTD) of Spike, appearing at P3 and rising in frequency at P4. Two of these Spike NTD mutations were similar to mutations occurring in VOCs: D215G and a deletion of 24 nucleotides (GCTATACATGTCTCTGGGACCAATGGTA21761G) resulting in a loss of 9 amino acids IHVSGTNGT (aa68-77). Additionally, we noticed a convergent mutation of L37 in E, detecting two mutations resulting in L37F and L37R. To determine the reproducibility of passage sequencing, an independent P4 PHE (P4B) was generated from P3 and sequenced, with very high levels of similarity between the two (**supplementary table 1**).

Like PHE, we identified core changes inherent to BT20.1 (**Fig 2B**), which were greater in number than PHE (10 vs 4), consistent with its later isolation (February 2020 versus June 2020) (**supplementary table 1**). These changes included, but were not limited to, D614G in Spike; R203K & G204K in N; and an out-of-frame deletion of 5 nucleotides in ORF7A leading to its premature truncation. Like PHE, we identified mutations arising rapidly upon consecutive passage in Vero cells (i.e., were not detected at P2), including the non-synonymous mutations T293I in NSP12 and P812R in Spike. Both mutations had similar patterns of change in frequency and constituted the majority of sequences by P3. Like PHE, we also detected minor variants (9), including G1251V and S1252C in Spike.

222

*Comparison of SARS-CoV-2 evolution in vitro during passage in Vero and primary human airway cells*

a.

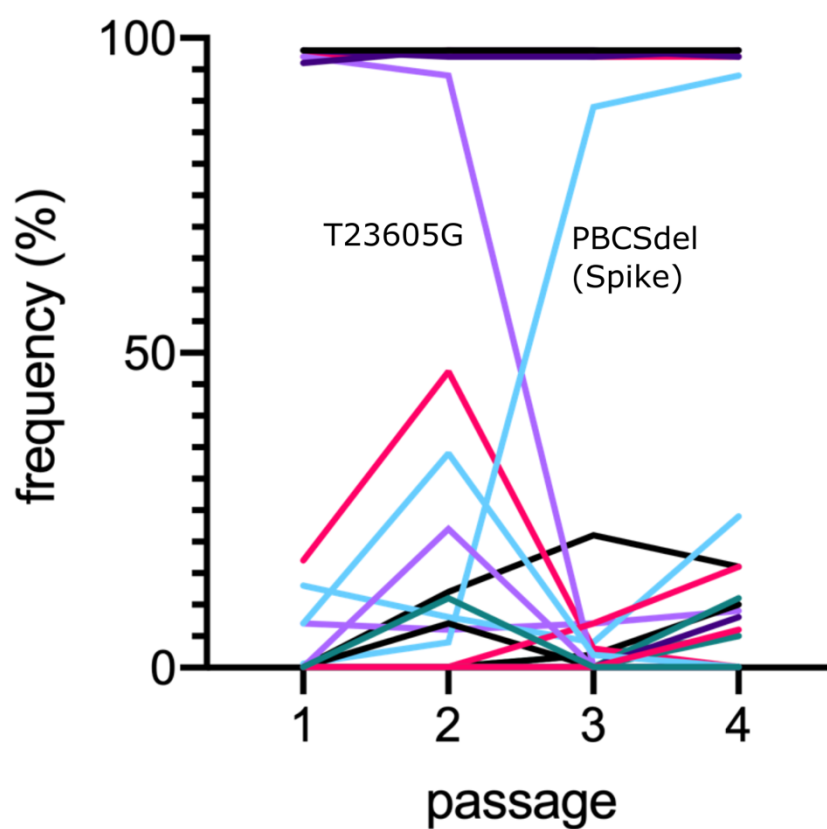

b.

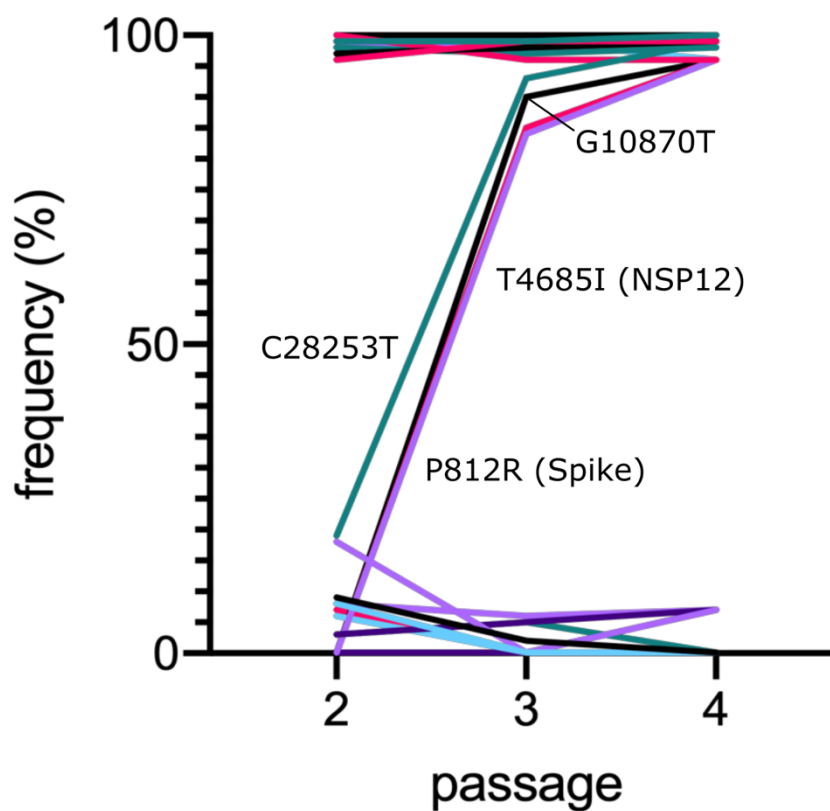

## *Comparison of SARS-CoV-2 evolution in vitro during passage in Vero and primary human airway cells*

224  
225  
226  
227  
228  
229  
230  
231  
232  
233

**Figure 2. Analysis of PHE and BT20.1 whole genome sequences during Vero cell passage.** Frequency of mutations detected for PHE (a) and BT20.1 (b) passage series on VeroE6 or Vero cells, respectively, relative to the reference sequence (Wuhan-Hu-1). Only sequences from P1-P4 (PHE) and P2-P4 (BT20.1) were analysed to facilitate adequate comparisons. Core changes are found consistently at high frequency and minor variants found at consistently low frequency (e.g. <50%). Only variants that significantly changed in frequency are marked on the graph. Colours do not reflect relationships between variants.

### ***Passage of SARS-CoV-2 on primary human airway cultures***

234  
235 We next sought to investigate the effect of host cell type on  
236 subsequent viral evolution, as our previous analysis assessed the  
237 contribution of viral background to viral evolution in Vero-derived cells. To  
238 this end, in parallel, we passaged SARS-CoV-2 samples on well-  
239 differentiated primary human airway epithelial cell cultures until P4, in a  
240 similar protocol as was carried out in Vero cells (**Fig 3A**). Primary cultures  
241 included WD-PNECs derived from two paediatric donors. For both PHE and  
242 BT20.1 robust infection and passage on WD-PNECs was established. For  
243 PHE, WD-PNECs were initially infected at MOI of 0.1 and virus harvested  
244 at 2-3 dpi, using the original P1 virus material. This was repeated for  
245 BT20.1, except unlike PHE, BT20.1 was directly isolated on primary  
246 cultures from the obtained clinical material. SARS-CoV-2 grew well in the  
247 primary cultures, reaching titres of  $\sim 10^6$  pfu/mL in 2-3 days in the apical  
248 compartment. Samples at each passage were subjected to sequencing as  
249 outlined above and analysed in a similar manner to those from the Vero  
250 cell passage series. For BT20.1 only P2, P3 and P4 were sequenced to  
251 compare with the data available for the equivalent Vero passage series.

252 In contrast to what was observed in VeroE6 cells, we did not detect  
253 any major genetic changes in PHE following passage in WD-PNECs (**Fig**  
254 **3B**). However, we did identify the PBCS deletion at low levels in minor  
255 variant analysis, but never reaching majority. Together with PBCS we  
256 found 34 changes as minor variants. From passage to passage, these  
257 mutations appeared, and disappeared, stochastically. Similarly, in BT20.1,  
258 unlike the Vero cell passage, we did not find corresponding mutations in

*Comparison of SARS-CoV-2 evolution in vitro during passage in Vero and primary human airway cells*

259 Nsp12 or Spike (**Fig 3C**). However, we identified a single amino acid  
260 deletion, Y1595, in NSP3. Intriguingly, this variant was maintained  
261 throughout the passage series at a moderate frequency of ~45%. At each  
262 passage, where possible, SARS-CoV-2 was titrated by plaque assay on  
263 Vero cells (**sFig 2**). However, we were unable to obtain titres for PHE and  
264 BT20.1 passage P3 and P1, respectively. We noticed slightly reduced  
265 titres of BT20.1 in primary cells at P4 compared to earlier passages,  
266 which was not observed for PHE (**sFig2**). WD-PNEC-grown viruses had  
267 less obvious plaques (**sFig 3 A and B**) and no evidence of cell-to-cell  
268 fusion was identified, even for BT20.1 (**sFig 3 C**). Similar to passage in  
269 Vero cells we identified two mutations in Spike (G1251V and S1252C),  
270 which appeared at low frequencies (<10%) and never increased (**table**  
271 **1**).  
272

## Comparison of SARS-CoV-2 evolution in vitro during passage in Vero and primary human airway cells

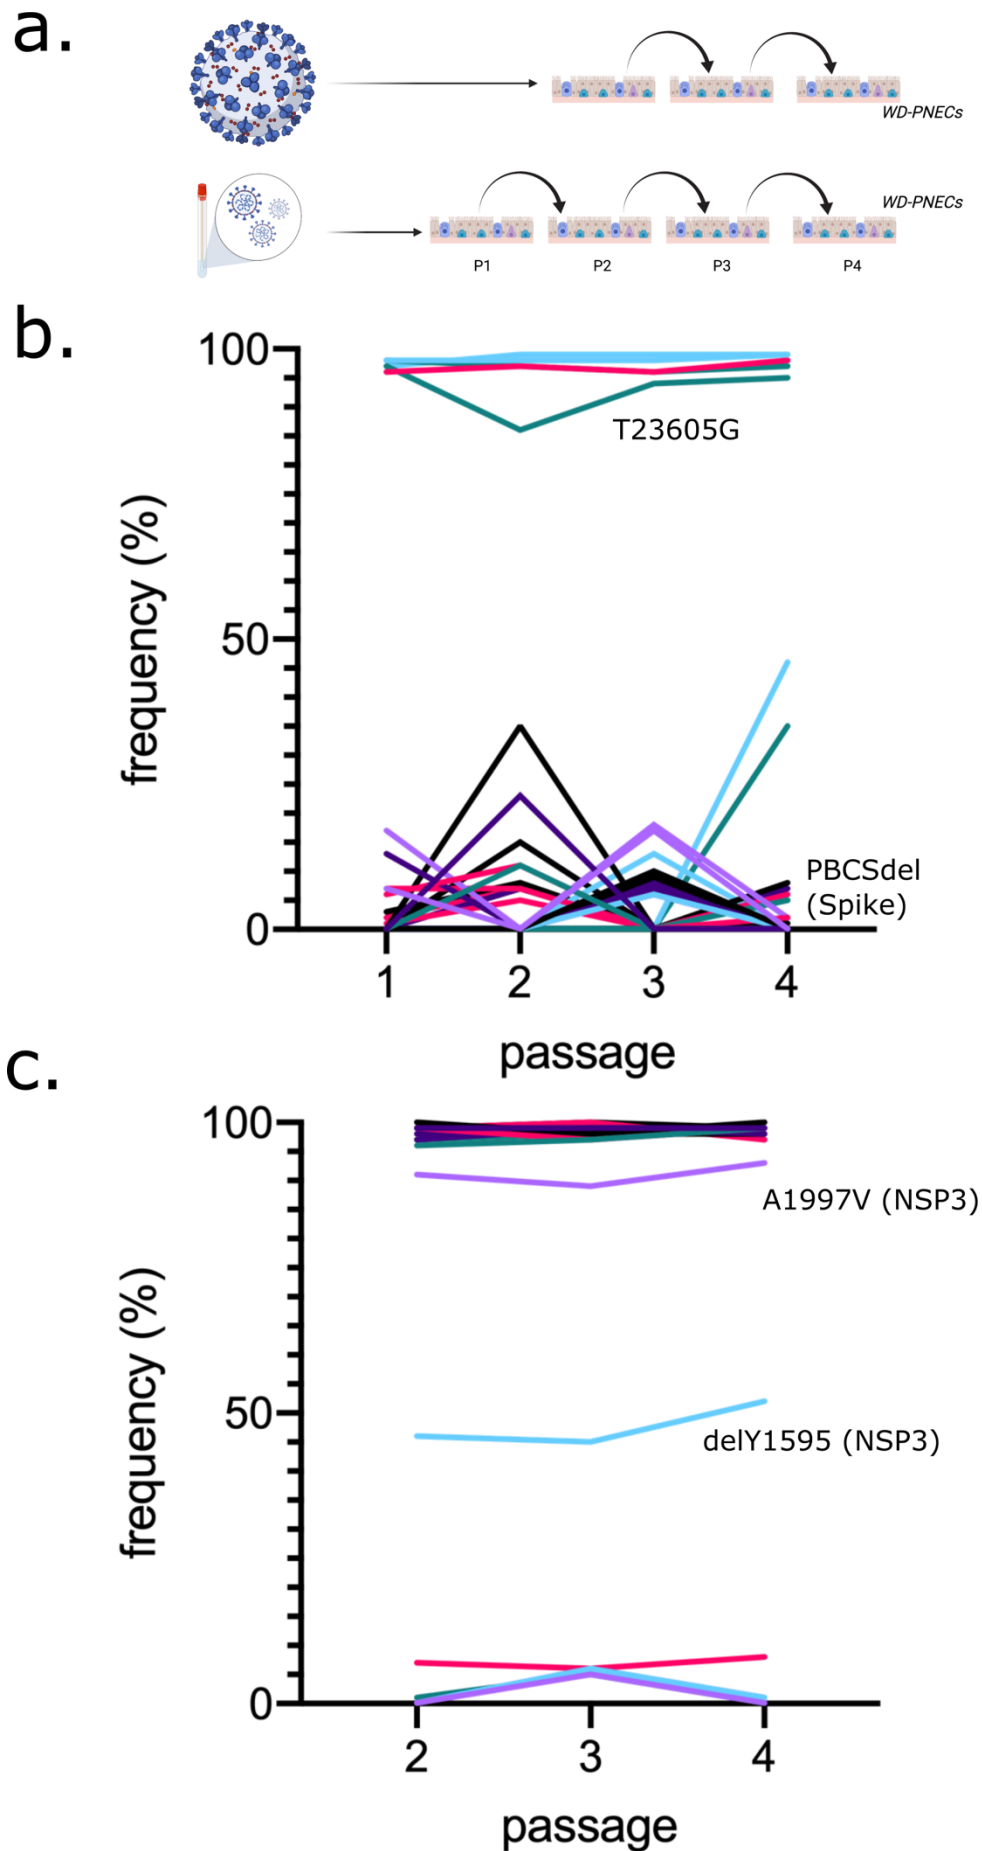

## *Comparison of SARS-CoV-2 evolution in vitro during passage in Vero and primary human airway cells*

274 **Figure 3. Analysis of PHE and BT20.1 whole genome sequences during WD-**  
275 **PNECs passage.** Schematic of SARS-CoV-2 isolation/passage series on WD-PNECs for  
276 PHE and BT20.1 (a). Frequency of mutations detected for PHE (b) and BT20.1 (c)  
277 passage series on WD-PNECs, respectively, relative to the reference sequence (Wuhan-  
278 Hu-1). Only sequences from P1-P4 (PHE) and P2-P4 (BT20.1) were analysed. PHE P1 is  
279 the original stock material obtained and hence is the same sequence as PHE P1 in figure  
280 2. Core changes were found consistently at high frequency and minor variants found at  
281 consistently low frequency (e.g. <50%). Only variants that significantly changed in  
282 frequency are marked on the graph. Colours do not reflect relationships between  
283 variants. Figures were generated with the aid of Biorender (<https://biorender.com/>).

284

### 285 ***Phenotypic differences between SARS-CoV-2 'PHE' and 'BT20.1'*** 286 ***P4***

287 Our data showing host cell dependency in viral evolution suggested  
288 differential fitness for specific viral genotypes (e.g., Vero cell-derived  
289 mutations that were not observed in WD-PNECs were less fit in primary  
290 cells). To test this hypothesis, we focused subsequent analysis on PHE  
291 and BT20.1 Vero P4 stocks with clear genetic differences between them,  
292 including the PHE PBCS deletion in Spike, and the P812R (Spike) and  
293 NSP12 mutations in BT20.1. To this end, we wished to directly compare  
294 the growth and multi-cycle replication kinetics of both strains in cell  
295 culture models of infection. To achieve this, we carried out a comparison  
296 of growth kinetics in several cell culture models, including Vero cells,  
297 VeroE6 cells modified to express human ACE2 and TMPRSS2 (VAT) (Rihn  
298 et al., 2021), and WD-PNECs (adult nasal) (**Fig 4A-C**). Of note,  
299 unmodified Vero and VeroE6 cells do not express human ACE2 and have  
300 very low levels of TMPRSS2 (**Matsuyama et al., 2020**). In Vero cells,  
301 SARS-CoV-2 grew to peak extracellular infectivity titres by ~48 hpi with  
302 titres of  $\sim 10^6$  pfu/mL. We noticed a growth attenuation of BT20.1 in Vero  
303 cells compared to PHE (**Fig 4A**). Comparing virus growth in VAT cells (**Fig**  
304 **4B**), both viruses grew better but the relative attenuation of BT20.1 was  
305 not observed in VAT cells. In contrast to previous Vero cell experiments,  
306 we observed a prominent growth defect of PHE compared to BT20.1 at  
307 early time points during infection (24/48 h) in WD-PNECs. However, both  
308 viruses reached similar titres by 72 hpi (**Fig 4C**). Together these data

*Comparison of SARS-CoV-2 evolution in vitro during passage in Vero and primary human airway cells*

309 clearly demonstrate phenotypic differences between our Vero cell-  
310 passaged viruses, demonstrating a critical role for the PBCS for efficient  
311 replication in primary cells.

## Comparison of SARS-CoV-2 evolution *in vitro* during passage in Vero and primary human airway cells

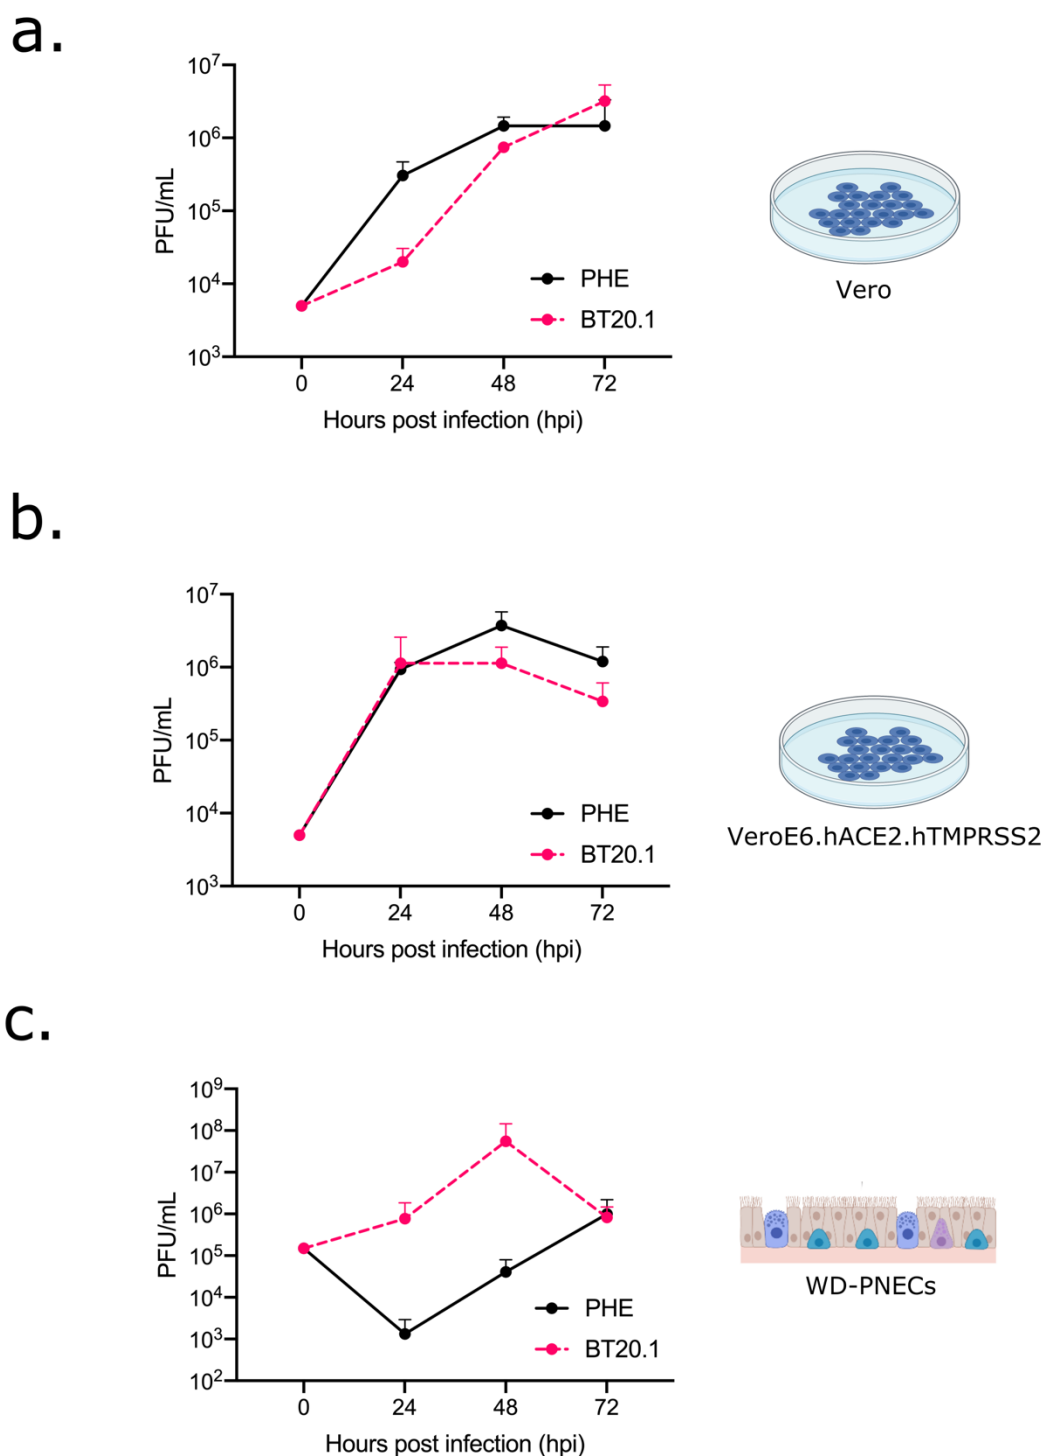

312

313 **Figure 4. Comparison of PHE P4 (Vero) and BT20.1 P4 (Vero) growth on**  
314 **different cell substrates.** Multicycle growth curves (MOI 0.01 for Vero or 0.1 for WD-



## *Comparison of SARS-CoV-2 evolution in vitro during passage in Vero and primary human airway cells*

315 PNECs) for PHE P4 (VeroE6) and BT20.1 P4 (Vero) on Vero (a), VeroE6 cells expressing  
316 human ACE2 and human TMPRSS2 (b), and adult WD-PNECs from 3 donors (c). Titres  
317 for Vero-derived cells are shown as means +/- SEM for triplicate wells and are  
318 representative of two independent experiments. Titres for WD-PNECs are shown as  
319 means +/- SEM for single wells from 3 donors. Data using BT20.1 are presented here as  
320 averages from 3 donors but have also been incorporated into a sister paper using  
321 separated, individual donor data (Broadbent et al., 2021 in submission). Figures were  
322 generated with the aid of Biorender (<https://biorender.com/>).  
323

## *Comparison of SARS-CoV-2 evolution in vitro during passage in Vero and primary human airway cells*

324

### **Discussion**

325 Investigation of the patterns of SARS-CoV-2 genetic diversity  
326 worldwide during outbreaks has already facilitated a genetic-based  
327 nomenclature of lineages and has also highlighted the emergence of  
328 functionally-relevant mutations, such as D614G in Spike, and those  
329 contained in extant VOCs (**Harvey et al., 2021**). Complementary to this,  
330 in vitro systems are an incredibly useful and tractable means to  
331 understand the forces influencing this viral evolution, in particular those  
332 that mimic in vivo-relevant conditions, such as WD-PNECs (**Hou et al.,**  
333 **2020**).

334 Our data and that of others demonstrate significant standing  
335 genetic diversity in viral populations in vitro that can be acted upon by  
336 rapid evolutionary processes. Although also observed in our work, from  
337 early in the study of SARS-CoV-2 evolution in Vero-like cells, it was  
338 revealed that the virus readily diversifies during culture with the most  
339 evident being mutations mapping to the PBCS of Spike (**Davidson et al.,**  
340 **2020; Klimstra et al., 2020; Lamers et al., 2021; Ogando et al.,**  
341 **2020; Pohl et al., 2021**). Consistent with our work, other studies have  
342 identified enhanced genetic stability, in particular of the PBCS only, during  
343 passage of one strain in Calu3 or primary airway organoids (**Lamers et**  
344 **al., 2021**). One striking finding of our work, which builds on previous  
345 studies, is that on several occasions for both isolates we observed a rapid  
346 increase in frequency of specific mutations in the PBCS and independently  
347 of it (PBCS deletion & P812R in Spike, and T293I in NSP12) to near  
348 fixation over the course of a couple of passages in Vero cells. These  
349 patterns suggest a selective phenotypic advantage in that particular cell  
350 culture system. Similar changes (including P812R and the NTD deletion)  
351 were identified in other studies (**Dieterle et al., 2020; Ramirez et al.,**  
352 **2021**). The fact that identical mutations arise independently (e.g., loss of  
353 the PBCS and P812R) is highly suggestive of convergent evolution,  
354 perhaps toward a similar phenotype. Our work on the loss of the PBCS in

## *Comparison of SARS-CoV-2 evolution in vitro during passage in Vero and primary human airway cells*

355 Vero cells and its association with attenuation in WD-PNECs is consistent  
356 with previous reports. However, it is noteworthy that we did not observe  
357 deletion or mutations in and around the PBCS during passage of BT20.1 in  
358 Vero cells.

359 In addition to the loss of the PBCS, we observed P812R in Spike and  
360 T293I in NSP12, although we were not able to associate them with  
361 changes in virus growth in WD-PNECs due to a lack of an additional  
362 comparable 'wild-type' isolates. However, the fact that parallel passage in  
363 WD-PNECs did not result in their increased frequency suggests that they  
364 confer a hitherto unrecognised disadvantage in the primary epithelial cell  
365 system. P812R is a non-conservative change and rapidly rose to near-  
366 fixation alongside NSP12 in BT20.1 in Vero cells. P812 sits near the S2'  
367 cleavage site and is a highly conserved position in SARS-CoV-2. However,  
368 non-P residues (e.g. serine) were occasionally found in nature but are  
369 rare (<https://nextstrain.org/>), which suggests a functional defect in vivo.  
370 Interestingly, P812R was observed before, in at least two other studies,  
371 associated with a change in Spike activity using full-length SARS-CoV-2  
372 and one using chimeric vesicular stomatitis virus encoding SARS-CoV-2  
373 Spike (**Dieterle et al., 2020; Ramirez et al., 2021**). Like previous  
374 work, we noted an association of P812R with enhanced cell-to-cell fusion  
375 when BT20.1 grown on Vero cells is compared to that grown in WD-PNECs  
376 (**sFig 3**). It was suggested that P812R generated a novel PBCS at the S2'  
377 site (**Ramirez et al., 2021**). Cleavage by furin-like proteases could thus  
378 compensate for lack of TMPRSS2-mediated proteolysis and activation in  
379 Vero cells. Although it is possible that P812R confers a similar phenotypic  
380 change as the PBCS deletion, it is not likely to be identical, given the clear  
381 differences in growth between PHE and BT20.1 in Vero cells and WD-  
382 PNECs. Along with P812R in S, BT20.1 carried a mutation in NSP12  
383 (T4685I/T293I), which is the viral RNA-dependent RNA polymerase. The  
384 mutation sits on the surface in close proximity to a zinc-binding site of the  
385 interface domain that mediates intra-NSP12 interactions and interactions

## *Comparison of SARS-CoV-2 evolution in vitro during passage in Vero and primary human airway cells*

386 between NSP12 and other polymerase co-factors, such as NSP8 (**Hillen**  
387 **et al., 2020**). Given the linkage between P812R and T4685I, further  
388 molecular virological work using isogenic viruses generated through  
389 reverse genetics is required to ascertain the impact of this mutation in  
390 relevant cell models. The mutations T4685I arose with P812R possibly  
391 suggesting genetic linkage, although this remains to be determined.

392 It is of interest that BT20.1 carries a deletion in ORF7A that results  
393 in a frameshift and C-terminal truncation of the protein, likely ablating the  
394 transmembrane domain and tail. ORF7A is a type 1 transmembrane  
395 protein and it has numerous putative functions involved in host-pathogen  
396 interactions and immune evasion (**Nemudryi et al., 2021**). ORF7A  
397 truncations in SARS-CoV-2 isolates have been discovered before, possibly  
398 associated with reduced capacity to subvert the innate immune response  
399 (**Nemudryi et al., 2021**). However, the previous work was carried out  
400 using non-clinically relevant cell models, such as Vero or HEK-derived  
401 lines. Our work suggests that full-length ORF7A is not required for  
402 replication in Vero or WD-PNECs and likely serves an accessory function  
403 that may affect replication and/or transmission in particular  
404 circumstances.

405 Not only did we observe changes reaching near-fixation in our  
406 dataset we also identified several lower frequency mutations in our viral  
407 populations. Consistent with this variation within a stock, we also noticed  
408 plaque size variation in passage stocks suggestive of functional  
409 differences between viral sub-clones (**Fig 1 E and F**). We detected an in-  
410 frame deletion of a single codon in the C-terminus of NSP3, located in the  
411 Y1 domain, which is located on the cytoplasmic face of the virus-  
412 remodelled ER membrane, where it may regulate replication complex  
413 stability by interacting with NSP4 (**Lei et al., 2018**). NSP3 itself is a  
414 multifunctional protein involved in numerous viral processes. The fact that  
415 the deletion did not rise to fixation suggests that it is at a competitive  
416 disadvantage compared to wild-type. The mutation in NSP3 is also

## *Comparison of SARS-CoV-2 evolution in vitro during passage in Vero and primary human airway cells*

417 interesting because it is maintained at a moderate frequency. Of  
418 considerable interest is the overlap between variations observed in Vero  
419 cells and that of VOCs, especially in the NTD of Spike. We observed three  
420 mutations in the NTD in PHE P3 and P4: E180K, D215G, and a deletion  
421 resulting in the loss of 9 amino acids. Variants identified in this study  
422 mapping to the ectodomain of Spike are marked on a structural model  
423 (**sFig 4**). For D215G and the deletion, these mutations are similar to  
424 those in VOCs, such as alpha and beta variants. Regarding mutations in  
425 NTD loops, several VOCs have convergently modified the amino acid  
426 identity of the loop. While in vivo this may be the result of antibody  
427 selection, in our system there are no antibodies, which suggests a role for  
428 NTD mutations independent of antibody selection. The rise in frequency is  
429 suggestive of a fitness advantage of these mutations. Further work is  
430 required to determine the function of the NTD of Spike and the impact of  
431 these mutations on the virus life cycle.

432 While general trends were similar between our two isolates in Vero  
433 cells (i.e., mutations rising to high frequency), specific mutations  
434 observed were not. It is likely that evolution of key mutations reflect  
435 inherent biological differences in viruses and not subtle changes in  
436 passaging conditions. In PHE, loss of the PBCS occurred, which was not  
437 observed in BT20.1, and vice versa regarding P812R and NSP12. This is  
438 consistent with an effect dependent on viral input or strain or genetic  
439 background through epistatic interactions between mutations, such as  
440 D614G in Spike. However, in numerous reports, isolation and passage of  
441 SARS-CoV-2 on Vero cells selected for a loss of the PBCS, which was not  
442 observed in our BT20.1 passage series. Alternatively, the mutation P812R  
443 could functionally achieve the same phenotype as the deletion of the  
444 PBCS, although our primary cell infection model where PHE was  
445 attenuated compared to BT20.1, would suggest that this is not the case.

446 By comparing evolution of the same isolates in two distinct cell  
447 culture systems, we observed a dependence on host cell substrate on

## *Comparison of SARS-CoV-2 evolution in vitro during passage in Vero and primary human airway cells*

448 downstream virus evolution. Namely, passage in WD-PNECs resulted in  
449 enhanced stability of SARS-CoV-2 genetic diversity at the consensus  
450 level. While the PBCS, P812R and NSP12 changes were identified in PHE  
451 and BT20.1 when grown in Vero cells, these changes did not rise to high  
452 frequencies in WD-PNECs. Differential accumulation of mutations may  
453 reflect distinct host cellular environments encountered upon passage in  
454 Vero or WD-PNECs. This reflects major differences in these cell  
455 substrates, including i) species and tissue differences; ii) reduced levels of  
456 TMPRSS2 in Vero cells; iii) reduced innate immune response in Vero cells  
457 as they are deficient in type 1 interferon production (**Emeny & Morgan,**  
458 **1979**). However, what affects the rise in P812R/NSP12 mutation remains  
459 unknown. Future work will assess the effect of these changes in BT20.1  
460 upon replication in WD-PNECS. Additionally, during passage of BT20.1 in  
461 WD-PNECs we identified a deletion in Nsp3, although the relevance and  
462 mechanism of this change is unknown.

463 In conclusion, by studying the evolution of SARS-CoV-2 during  
464 passage in distinct cellular substrates we shed light on the forces that  
465 shape viral fitness, unveiling a collaboration between both viral and host  
466 factors in driving SARS-CoV-2 genetic diversity, which helps define the  
467 molecular correlates of fitness in the natural target cells. Finally, on a  
468 practical note, our results support close characterisation of virus stocks  
469 for experimentation in vitro and in vivo and suggest ways to mitigate  
470 unwanted cell culture artefacts, critical for understanding host-pathogen  
471 interactions and identification of antiviral interventions.

472

473

474

## *Comparison of SARS-CoV-2 evolution in vitro during passage in Vero and primary human airway cells*

475

476

### **Figure legends**

477

478 **Figure 1. Isolation and passage of PHE and BT20.1 in Vero-derived**

479 **cells.** Schematic of SARS-CoV-2 isolation/serial passage series on VeroE6

480 or Vero cells for PHE and BT20.1 from isolation to P4 (a). Extracellular

481 infectivity titres for stocks generated from P2-P4 VeroE6/Vero passage for

482 PHE and BT20.1 using plaque assay protocol on Vero cells (b). Plaque

483 visualisation of PHE (c) and BT20.1 (d) P4, and P2 (e and f) on Vero cells.

484 Figures were generated with the aid of Biorender

485 (<https://biorender.com/>).

486

487 **Figure 2. Analysis of PHE and BT20.1 whole genome sequences**

488 **during Vero cell passage.** Frequency of mutations detected for PHE (a)

489 and BT20.1 (b) passage series on VeroE6 or Vero cells, respectively,

490 relative to the reference sequence (Wuhan-Hu-1). Only sequences from

491 P1-P4 (PHE) and P2-P4 (BT20.1) were analysed to facilitate adequate

492 comparisons. Core changes are found consistently at high frequency and

493 minor variants found at consistently low frequency (e.g. <50%). Only

494 variants that significantly changed in frequency are marked on the graph.

495 Colours do not reflect relationships between variants.

496

497 **Figure 3. Analysis of PHE and BT20.1 whole genome sequences**

498 **during WD-PNECs passage.** Schematic of SARS-CoV-2

499 isolation/passage series on WD-PNECs for PHE and BT20.1 (a). Frequency

500 of mutations detected for PHE (b) and BT20.1 (c) passage series on WD-

501 PNECs, respectively, relative to the reference sequence (Wuhan-Hu-1).

502 Only sequences from P1-P4 (PHE) and P2-P4 (BT20.1) were analysed.

503 PHE P1 is the original stock material obtained and is hence the same

504 sequence as PHE P1 in figure 2. Core changes are found consistently at

## *Comparison of SARS-CoV-2 evolution in vitro during passage in Vero and primary human airway cells*

505 high frequency and minor variants found at consistently low frequency  
506 (e.g., <50%). Only variants that significantly changed in frequency are  
507 marked on the graph. Colours do not reflect relationships between  
508 variants. Figures were generated with the aid of Biorender  
509 (<https://biorender.com/>).

510

511 **Figure 4. Comparison of PHE P4 (Vero) and BT20.1 P4 (Vero)**  
512 **growth on different cell substrates.** Multicycle growth curves (MOI  
513 0.01 for Vero or 0.1 for WD-PNECs) for PHE P4 (VeroE6) and BT20.1 P4  
514 (Vero) on Vero (a), VeroE6 cells expressing human ACE2 and human  
515 TMPRSS2 (b), and adult WD-PNECs from 3 donors (c). Titres for Vero-  
516 derived cells are shown as means +/- SEM for triplicate wells and are  
517 representative of two independent experiments. Titres for WD-PNECs are  
518 shown as means +/- SEM for single wells from 3 donors. Data using  
519 BT20.1 have been reproduced here as averages from 3 donors but have  
520 also been incorporated into a sister paper using separated, individual  
521 donor data (Broadbent et al., 2021 in submission). Figures were  
522 generated with the aid of Biorender (<https://biorender.com/>).

523

524 **sTable 1. Frequency of variants in reference to Wuhan-Hu-1**  
525 **identified in this study.** Variants only shown where there was at least  
526 one instance of frequency >5%. Where undetectable an arbitrary value of  
527 0.1 was assigned. Frequency data is highlighted by colour (green for  
528 higher, yellow for lower). Mutations have been assigned status of core,  
529 variant or minor. Additionally, for each variant, data for nucleotide  
530 location, reference and variant nucleotides, gene & protein location, and  
531 consequence (e.g., synonymous [S] or non-synonymous [NS]) are  
532 shown.

533



*Comparison of SARS-CoV-2 evolution in vitro during passage in Vero and primary human airway cells*

534 **sFig 1. Fusogenicity of PHE and BT20.1 P4 on Vero cells.** Higher  
535 magnification images of plaque visualisation of PHE (a) and BT20.1 (b) P4  
536 on Vero cells from the same images shown in Figure 1.

537

538 **sFig 2. Growth kinetics of PHE and BT20.1 during passage in WD-**  
539 **PNECs.** Infectivity titres for material generated from isolation/passage of  
540 PHE and BT20.1 on WD-PNECs.

541

542 **sFig 3. Plaque morphology of SARS-CoV-2 grown in WD-PNECs.**  
543 Plaque visualisation of PHE (a) and BT20.1 (b) P4 on Vero cells. Higher  
544 magnification images of plaque visualisation of BT20.1 (c) P4 on Vero  
545 cells from the same images shown (b).

546

547 **sFig 4. Location of Spike mutant variants observed in this study on**  
548 **model structure of a single Spike monomer in the pre-fusion state**  
549 **(PDB 7C2L**

550 **from (Chi et al., 2020)).** Variants identified in the Spike cytoplasmic tail  
551 (G1251V and S1252C) are not shown.

552

553

554

## *Comparison of SARS-CoV-2 evolution in vitro during passage in Vero and primary human airway cells*

555

556

### **Materials and methods**

557

#### **Continuous cell line culture**

559 In this study, 3 continuous cell lines were used: Vero wildtype (number),  
560 Vero E6, and Vero E6 expressing human ACE2 and TMPRSS2 (VAT) (Rihn  
561 et al., 2021). All cells were grown in DMEM (5% FCS v/v) with antibiotics.  
562 VAT cells were maintained in the presence of additional antibiotics to  
563 select of cells carrying transgenes. Cell lines were routinely tested for  
564 mycoplasma contamination and no evidence of contamination was  
565 detected.

566

#### **WD-PNECs**

568 Nasal epithelial cells from preschool age children with recurrent wheeze  
569 (for initial passaging) and from healthy adults (for final comparison of PHE  
570 and BT20.1 P4 viruses) were obtained by brushing of the nasal turbinates  
571 with an interdental brush (DentoCare). Cells were cultured in monolayer  
572 until passage 3 then seeded onto collagen-coated Transwells (6 mm, 0.4  
573 µm pore size; Corning). Once confluent the apical medium was removed  
574 to create an air-liquid interface which, together with specialised media  
575 (Pneumacult ALI, Stemcell Technologies), triggered differentiation  
576 (Broadbent et al. 2016. Broadbent et al. 2020). Complete differentiation  
577 (after a minimum of 21 d) was confirmed by an intact culture, extensive  
578 cilia coverage and mucus production.

579

#### **Viruses**

581 Two SARS-CoV-2 isolates were used throughout this study, including  
582 'PHE' and 'BT20.1'. PHE was provided as an early passage isolate on  
583 VeroE6 cells while BT20.1 was provided directly as a nasopharyngeal  
584 swab in virus transport media clinical material from a positive case from

## *Comparison of SARS-CoV-2 evolution in vitro during passage in Vero and primary human airway cells*

585 Belfast in June 2020. Stocks were prepared in Vero or VeroE6 cells in  
586 DMEM containing 2.5% FCS (v/v) infected at a low MOI (~0.001).  
587 Infections were harvested when maximal cytopathic effect was noted,  
588 usually between 3-4 days post infection. Infected culture supernatant was  
589 harvested, clarified by centrifugation and stored at -80°C. WD-PNECs  
590 were apically infected with SARS-CoV-2 for 1 h, after which the inoculum  
591 was removed and the apical surface gently rinsed with DMEM. Virus was  
592 harvested from WD-PNECs by incubation of the apical surface with DMEM  
593 for 5 min at room temperature in the absence of serum. Harvested virus  
594 was immediately stored at -80. All SARS-CoV-2 work was carried out  
595 under BSL3 conditions in a dedicated facility in QUB.

596

### **597 Plaque assays**

598 Our plaque assay protocol is based on the methodology available here:  
599 [https://www.protocols.io/view/viral-titration-of-sars-cov-2-by-plaque-](https://www.protocols.io/view/viral-titration-of-sars-cov-2-by-plaque-assay-semi-be4zjgx6)  
600 [assay-semi-be4zjgx6](https://www.protocols.io/view/viral-titration-of-sars-cov-2-by-plaque-assay-semi-be4zjgx6). Near confluent monolayers of Vero cells in 24 or 6  
601 well plates were infected. On the day of titration growth media was  
602 replaced with DMEM (0% FCS) (250 µL). Virus dilutions were prepared in  
603 plate and incubated for 30 min after which the 2x overlay medium  
604 (containing 2% agarose) was added. Plates were incubated for 3 days at  
605 37°C. At 3 dpi PFA (8%) was added to the cultures and cells  
606 fixed/inactivated for at least 20 min. Following fixation, the PFA was  
607 removed and monolayers stained for 10 min using crystal violet (1% w/v  
608 in ethanol 20%). Following staining, residual crystal violet solution was  
609 removed, plates were rinsed in water and submerged in Chemgene prior  
610 to drying and removing from the hood for visualisation and quantification.  
611 To calculate PFU/mL, plaques at a dilution were quantified, the precipice  
612 of this number used, and multiplied by the dilution factor (4). For  
613 visualisation of plaque assays, whole plates were scanned using a Celigo  
614 imaging cytometer (Nexcelom Bioscience).

615

## *Comparison of SARS-CoV-2 evolution in vitro during passage in Vero and primary human airway cells*

### 616 **Virus whole genome sequencing**

617 Virus whole genome sequencing used methods developed by the ARTIC  
618 network (<https://artic.network>;(Tyson et al., 2020)) and the COG-UK  
619 Consortium. Culture supernatants were inactivated by addition of Triton  
620 X-100 to 1.5% (v/v). Viral RNA (total nucleic acid) was extracted from  
621 inactivated samples (200 µL) using the MagNA Pure Compact instrument  
622 and MagNA Pure Compact Nucleic Acid Isolation Kit I (Roche Molecular  
623 Systems Inc, Burgess Hill, UK). Purified nucleic acid was eluted into 100  
624 µL and used immediately or stored at -80°C. For first-strand cDNA  
625 synthesis, nucleic acid (5 µL) was used as template for reverse  
626 transcription using LunaScript® RT SuperMix Kit (New England Biolabs,  
627 Hitchin, UK) in 20 µL reaction volume. Primers were annealed (65°C,  
628 5min, snap-cool on ice) prior to addition of reverse transcriptase.  
629 Reactions were incubated at 42°C (50 min) then stopped at 70°C (10  
630 min). The resulting cDNA was used immediately for PCR or stored at -  
631 20°C. In brief, these were run as two separate multiplex PCR “pools” (A &  
632 B) using the ARTIC version 3 primer set (ARTIC nCoV-2019 V3 Panel, IDT  
633 DNA Inc, Leuven, Belgium; [https://github.com/artic-network/primer-](https://github.com/artic-network/primer-schemes/tree/master/nCoV-2019)  
634 [schemes/tree/master/nCoV-2019](https://github.com/artic-network/primer-schemes/tree/master/nCoV-2019)) and Q5 DNA polymerase mastermix  
635 (New England Biolabs). Following PCR, the amplicons from pools A & B  
636 were combined, and the resulting pooled amplicons (98 x 450 bp  
637 overlapping tiled amplicons, spanning the SARS-CoV-2 genome) were  
638 purified using Kapa HyperPure beads (Roche Molecular Systems Inc) and  
639 quantified using a Qubit fluorometer and dsDNA HS Assay Kit (Thermo  
640 Fisher Inc, Manchester, UK). Amplicon sequencing libraries were prepared  
641 using the Nextera DNA Flex library kit according to the manufacturer’s  
642 instructions (Illumina Ltd., Cambridge, UK). Libraries were sequenced on  
643 a MiSeq (Illumina) using a MiSeq Reagent Kit v2 and 2 x 151 bp paired-  
644 end sequencing protocol (Illumina).

645

### 646 **Sequence analysis**

*Comparison of SARS-CoV-2 evolution in vitro during passage in Vero and primary human airway cells*

647 The FASTQ files were uploaded into the Galaxy web platform, and we  
648 used the public server at usegalaxy.eu to analyse the data (**Afgan et al.,**  
649 **2018**). The workflow used was specially optimized for Illumina-  
650 sequenced based ARTIC pair end data with the intention to detect allelic  
651 variants (AVs) in SARS-CoV-2 genomes (**Maier et al., 2021**). This  
652 analysis converted FASTQ data to annotated AVs through a series of steps  
653 that include QC, trimming ARTIC primer sequences off reads with the iVar  
654 package, mapping using bwa-mem, deduplication, AV calling using lofreq,  
655 and filtering AVs that both occurred at an allele frequency (AF)  $\geq 5\%$ , and  
656 were supported by  $\geq 10$  reads. As we could not determine the background  
657 frequency of mutations we focused on those variants with a minor allele  
658 frequency  $\geq 5\%$ , and were supported by  $\geq 10$  reads in at least one  
659 passage of the series. Furthermore, we focused our greater analysis on  
660 those found in more than one passage and those that substantially rise in  
661 frequency. Raw data and consensus sequences will be uploaded during  
662 review and before publishing.

663

664

665

666

667

668

669

670

671

672

673

674

675

676

## Comparison of SARS-CoV-2 evolution in vitro during passage in Vero and primary human airway cells

677

| PHE VER066 |                             |         |     |     |     |     |     |          |        |       |                    |         |
|------------|-----------------------------|---------|-----|-----|-----|-----|-----|----------|--------|-------|--------------------|---------|
| POS        | REFERENCE                   | VARIANT | P1  | P2  | P3  | P4A | P4B | CATEGORY | GENE   | S/NS? | CONSEQUENCE        | PROTEIN |
| 7749       | C                           | T       | 0.1 | 12  | 21  | 16  | 19  | MINOR    | ORF1AB | NS    | T2495I             | NSP3    |
| 8782       | C                           | T       | 97  | 98  | 97  | 97  | 98  | CORE     | ORF1AB | S     |                    |         |
| 9534       | C                           | T       | 0.1 | 0.1 | 2   | 5   | 5   | MINOR    | ORF1AB | NS    | T3990I             | NSP4    |
| 18488      | C                           | C       | 98  | 97  | 97  | 98  | 96  | CORE     | ORF1AB | NS    | I6075T             | NSP14   |
| 19983      | C                           | CT      | 7   | 6   | 7   | 9   | 8   | MINOR    | ORF1AB | NS    | FRAMESHIFT, D6576* | NSP15   |
| 21697      | C                           | T       | 13  | 8   | 4   | 24  | 15  | MINOR    | ORF1AB | S     |                    |         |
| 21761      | GCTATACATGCTCTGGGACCAATGGTA | G       | 0.1 | 0.1 | 2   | 10  | 6   | MINOR    | SPIKE  | NS    | IHVSGTNGT68-77del  | SPIKE   |
| 21846      | C                           | T       | 17  | 47  | 3   | 0.1 | 0.1 | MINOR    | SPIKE  | NS    | T95I               | SPIKE   |
| 22100      | G                           | A       | 0.1 | 0.1 | 0.1 | 11  | 15  | MINOR    | SPIKE  | NS    | E180K              | SPIKE   |
| 22206      | A                           | G       | 0.1 | 0.1 | 0.1 | 8   | 11  | MINOR    | SPIKE  | NS    | D215G              | SPIKE   |
| 23605      | T                           | G       | 97  | 94  | 0.1 | 0.1 | 0.1 | VARIANT  | SPIKE  | S     |                    |         |
| 23597      | AATTCTCTCGGGCGGCACGTAGTG    | A       | 0.6 | 4   | 89  | 94  | 94  | VARIANT  | SPIKE  | NS    | NSPRRARSV679I      | SPIKE   |
| 25339      | C                           | T       | 0.1 | 7   | 0.1 | 0.1 | 0.1 | MINOR    | SPIKE  | S     |                    |         |
| 26353      | C                           | T       | 0.1 | 0.1 | 7   | 16  | 19  | MINOR    | E      | NS    | L37F               | E       |
| 26354      | C                           | G       | 0.1 | 0.1 | 0.1 | 5   | 5   | MINOR    | E      | NS    | L37R               | E       |
| 28144      | T                           | C       | 96  | 98  | 98  | 97  | 97  | CORE     | ORF8   | NS    | L84S               | ORF8    |
| 28833      | C                           | T       | 0.1 | 22  | 0.1 | 0.1 | 0.1 | MINOR    | N      | NS    | S187L              | N       |
| 29366      | C                           | T       | 7   | 34  | 2   | 0.1 | 0.1 | MINOR    | N      | NS    | P365S              | N       |
| 29596      | A                           | G       | 98  | 98  | 98  | 98  | 98  | CORE     | ORF10  | NS    | I13M               | ORF10   |
| 29637      | T                           | C       | 0.1 | 0.1 | 0.1 | 5   | 5   | MINOR    | ORF10  | NS    | I27I               | ORF10   |
| 29844      | AT                          | A       | 0.1 | 11  | 0.1 | 0.1 | 0.1 | MINOR    | 3' UTR | S     |                    | NC      |

  

| PHE WD-PNECS |                          |         |     |     |     |     |          |        |       |                    |         |
|--------------|--------------------------|---------|-----|-----|-----|-----|----------|--------|-------|--------------------|---------|
| POS          | REFERENCE                | VARIANT | P1  | P2  | P3  | P4  | CATEGORY | GENE   | S/NS? | CONSEQUENCE        | PROTEIN |
| 241          | C                        | T       | 0.1 | 0.1 | 6   | 0.1 | MINOR    | 5' UTR | S     |                    |         |
| 514          | TGTTATG                  | T       | 2   | 7   | 0.1 | 0.1 | MINOR    | ORF1AB | S     | MV85DEL            | NSP1    |
| 1593         | C                        | T       | 0.1 | 0.1 | 0.1 | 35  | MINOR    | ORF1AB | NS    | S443F              | NSP2    |
| 2994         | A                        | C       | 0.1 | 0.1 | 0.1 | 7   | MINOR    | ORF1AB | NS    | E910A              | NSP3    |
| 4455         | C                        | T       | 0.1 | 15  | 0.1 | 0.1 | MINOR    | ORF1AB | NS    | A1397V             | NSP3    |
| 4928         | A                        | T       | 0.1 | 0.1 | 0.1 | 46  | MINOR    | ORF1AB | NS    | N1555Y             | NSP3    |
| 6696         | C                        | CT      | 3   | 8   | 0.1 | 1   | MINOR    | ORF1AB | NS    | L2146S*            | NSP3    |
| 6750         | A                        | G       | 0.1 | 7   | 0.1 | 0.1 | MINOR    | ORF1AB | NS    | N2162S             | NSP3    |
| 7444         | A                        | G       | 0.1 | 0.1 | 10  | 0.1 | MINOR    | ORF1AB | S     |                    |         |
| 7749         | C                        | T       | 0.1 | 7   | 0.1 | 0.1 | MINOR    | ORF1AB | NS    | T2495I             | NSP3    |
| 7866         | G                        | T       | 0.1 | 0.1 | 6   | 0.1 | MINOR    | ORF1AB | NS    | G2534V             | NSP3    |
| 8782         | C                        | T       | 97  | 98  | 98  | 98  | CORE     | ORF1AB | S     |                    |         |
| 9532         | C                        | T       | 0.1 | 15  | 0.1 | 0.1 | MINOR    | ORF1AB | S     |                    |         |
| 11074        | C                        | CT      | 1   | 5   | 0.1 | 0.1 | MINOR    | ORF1AB | NS    | L3606F*            | NSP6    |
| 12809        | C                        | T       | 0.1 | 0.1 | 0.1 | 5   | MINOR    | ORF1AB | NS    | L4182F             | NSP9    |
| 12860        | A                        | G       | 0.1 | 0.1 | 10  | 0.1 | MINOR    | ORF1AB | NS    | S4199G             | NSP9    |
| 13604        | G                        | A       | 0.1 | 0.1 | 7   | 0.1 | MINOR    | ORF1AB | NS    | R4447H             | NSP12   |
| 16949        | C                        | T       | 0.1 | 0.1 | 13  | 0.1 | MINOR    | ORF1AB | NS    | P556L              | NSP13   |
| 17440        | C                        | T       | 0.1 | 35  | 0.1 | 0.1 | MINOR    | ORF1AB | NS    | P5726S             | NSP13   |
| 18063        | TA                       | T       | 0.1 | 0.1 | 9   | 0.1 | MINOR    | ORF1AB | NS    | frameshift         |         |
| 18488        | T                        | C       | 98  | 97  | 96  | 97  | CORE     | ORF1AB | NS    | I6075T             | NSP14   |
| 18508        | C                        | T       | 0.1 | 0.1 | 0.1 | 8   | MINOR    | ORF1AB | NS    | L6082F             | NSP14   |
| 19983        | C                        | CT      | 7   | 7   | 0.1 | 6   | MINOR    | ORF1AB | NS    | FRAMESHIFT, D6576* | NSP15   |
| 20178        | C                        | T       | 0.1 | 0.1 | 0.1 | 5   | MINOR    | ORF1AB | S     |                    |         |
| 21697        | C                        | T       | 13  | 0.1 | 8   | 0.1 | MINOR    | SPIKE  | S     |                    |         |
| 21846        | C                        | T       | 17  | 0.1 | 18  | 2   | MINOR    | SPIKE  | NS    | T95I               | SPIKE   |
| 23277        | C                        | T       | 0.1 | 0.1 | 10  | 0.1 | MINOR    | SPIKE  | NS    | T572I              | SPIKE   |
| 23592        | C                        | C       | 0.1 | 0.1 | 9   | 0.1 | MINOR    | SPIKE  | NS    | Y674H              | SPIKE   |
| 23597        | AATTCTCTCGGGCGGCACGTAGTG | A       | 6   | 11  | 0   | 2   | MINOR    | SPIKE  | NS    | NSPRRARSV679I      | SPIKE   |
| 23605        | T                        | G       | 97  | 86  | 94  | 95  | CORE     | SPIKE  | S     |                    |         |
| 26681        | C                        | T       | 0.1 | 0.1 | 7   | 0.1 | MINOR    | M      | S     |                    | M       |
| 27434        | C                        | T       | 0.1 | 0.1 | 6   | 0.1 | MINOR    | ORF7A  | NS    | T14I               | 7A      |
| 27509        | C                        | T       | 0.1 | 0.1 | 6   | 0.1 | MINOR    | ORF7A  | NS    | T39I               | 7A      |
| 27814        | TTG                      | T       | 0.1 | 0.1 | 10  | 1   | MINOR    | ORF8   | NS    | FRAMESHIFT         | 7B      |
| 28144        | T                        | C       | 96  | 97  | 96  | 98  | CORE     | ORF8   | NS    | L84S               | 8       |
| 28393        | T                        | C       | 0.1 | 11  | 0.1 | 0.1 | MINOR    | ORF8   | S     |                    |         |
| 29274        | C                        | T       | 0.1 | 23  | 0.1 | 0.1 | MINOR    | N      | NS    | T334I              | N       |
| 29366        | C                        | T       | 7   | 0.1 | 17  | 0.1 | MINOR    | ORF10  | NS    | P365S              | N       |
| 29596        | A                        | G       | 98  | 98  | 98  | 99  | CORE     | 10     | NS    | I13M               | 10      |

  

| BT20.1 VERO |           |         |     |     |     |     |          |        |       |                           |         |
|-------------|-----------|---------|-----|-----|-----|-----|----------|--------|-------|---------------------------|---------|
| POS         | REFERENCE | VARIANT | P1  | P2  | P3  | P4  | CATEGORY | GENE   | S/NS? | CONSEQUENCE               | PROTEIN |
| 241         | C         | T       | 100 | 100 | 100 | 100 | CORE     | 5' UTR | S     |                           |         |
| 635         | C         | T       | 7   | 0.1 | 0.1 |     | MINOR    | ORF1AB | NS    | R124C                     | NSP1    |
| 1420        | C         | T       | 98  | 99  | 99  |     | CORE     | ORF1AB | S     |                           |         |
| 1681        | G         | A       | 99  | 99  | 99  |     | CORE     | ORF1AB | S     |                           |         |
| 3037        | C         | T       | 98  | 99  | 99  |     | CORE     | ORF1AB | S     |                           |         |
| 6255        | C         | T       | 96  | 99  | 96  |     | CORE     | ORF1AB | NS    | A1997V                    | NSP3    |
| 10870       | G         | T       | 0.1 | 90  | 96  |     | VARIANT  | ORF1AB | S     |                           |         |
| 14318       | C         | T       | 0.1 | 85  | 96  |     | VARIANT  | ORF1AB | NS    | T468S1                    | NSP12   |
| 14408       | C         | T       | 98  | 97  | 98  |     | CORE     | ORF1AB | NS    | P4715I                    | NSP12   |
| 16293       | CATACGT   | C       | 0.1 | 0.1 | 7   |     | MINOR    | ORF1AB | NS    | CHANGE                    |         |
| 19983       | C         | CT      | 8   | 6   | 7   |     | MINOR    | ORF1AB | NS    | FRAMESHIFT, D6576*        | NSP15   |
| 22311       | C         | T       | 6   | 0.1 | 0.1 |     | MINOR    | SPIKE  | NS    | T205I                     | SPIKE   |
| 23403       | A         | G       | 97  | 98  | 99  |     | CORE     | SPIKE  | NS    | D614G                     | SPIKE   |
| 23997       | C         | G       | 0.1 | 84  | 96  |     | VARIANT  | SPIKE  | NS    | P812R                     | SPIKE   |
| 25314       | G         | T       | 3   | 5   | 0.1 |     | MINOR    | SPIKE  | NS    | G1251V                    | SPIKE   |
| 25317       | C         | G       | 3   | 5   | 7   |     | MINOR    | SPIKE  | NS    | S1252C                    | SPIKE   |
| 25521       | C         | T       | 18  | 0.1 | 7   |     | MINOR    | ORF3A  | S     |                           |         |
| 27208       | C         | T       | 8   | 0.1 | 0.1 |     | MINOR    | ORF6   | NS    | H3Y                       | ORF6    |
| 27213       | C         | T       | 9   | 2   | 0.1 |     | MINOR    | ORF6   | S     |                           |         |
| 27671       | TTC AAG   | T       | 100 | 96  | 96  |     | CORE     | ORF7A  | NS    | FRAMESHIFT and truncation | ORF7A   |
| 28253       | C         | T       | 19  | 93  | 99  |     | VARIANT  | ORF8   | S     |                           |         |
| 28881       | G         | A       | 97  | 98  | 99  |     | CORE     | N      | NS    | R203K                     | N       |
| 28882       | G         | A       | 96  | 99  | 99  |     | CORE     | N      | S     |                           |         |
| 28883       | G         | C       | 99  | 99  | 100 |     | CORE     | N      | NS    | G204R                     | N       |

  

| BT20.1 WD-PNECS |           |         |     |     |     |    |          |        |       |                    |         |
|-----------------|-----------|---------|-----|-----|-----|----|----------|--------|-------|--------------------|---------|
| POS             | REFERENCE | VARIANT | P1  | P2  | P3  | P4 | CATEGORY | GENE   | S/NS? | CONSEQUENCE        | PROTEIN |
| 241             | C         | T       | 99  | 100 | 99  |    | CORE     | 5' UTR | S     |                    |         |
| 1420            | C         | T       | 99  | 100 | 97  |    | CORE     | ORF1AB | S     |                    |         |
| 1681            | G         | A       | 97  | 98  | 99  |    | CORE     | ORF1AB | S     |                    |         |
| 3037            | C         | T       | 98  | 99  | 99  |    | CORE     | ORF1AB | S     |                    |         |
| 6255            | C         | T       | 91  | 89  | 93  |    | CORE     | ORF1AB | NS    | A1997V             | NSP3    |
| 6683            | AATT      | A       | 46  | 45  | 52  |    | VARIANT  | ORF1AB | NS    |                    |         |
| 14408           | C         | T       | 99  | 98  | 98  |    | CORE     | ORF1AB | NS    | P4715L             | NSP12   |
| 19983           | C         | CT      | 7   | 6   | 8   |    | MINOR    | ORF1AB | NS    | FRAMESHIFT, D6576* | NSP15   |
| 21101           | G         | GT      | 1   | 5   | 0.1 |    | MINOR    | ORF1AB | NS    | FRAMESHIFT, F6948  | NSP16   |
| 23403           | A         | G       | 97  | 99  | 98  |    | CORE     | SPIKE  | NS    | D614G              | SPIKE   |
| 25314           | G         | T       | 0.1 | 6   | 1   |    | MINOR    | SPIKE  | NS    | G1251V             | SPIKE   |
| 25317           | C         | G       | 0.1 | 6   | 1   |    | MINOR    | SPIKE  | NS    | S1252C             | SPIKE   |
| 27671           | TTC AAG   | T       | 100 | 98  | 100 |    | CORE     | ORF7A  | NS    |                    |         |
| 28881           | G         | A       | 99  | 97  | 99  |    | CORE     | N      | NS    | R203K              | N       |
| 28882           | G         | A       | 96  | 97  | 99  |    | CORE     | N      | S     |                    |         |
| 28883           | G         | C       | 99  | 99  | 99  |    | CORE     | N      | NS    | G204R              | N       |
| 29418           | T         | A       | 0.1 | 5   | 0.1 |    | MINOR    | N      | NS    | L382*              | N       |

Supplementary table 1.

678

679

*Comparison of SARS-CoV-2 evolution in vitro during passage in Vero and primary human airway cells*

a.

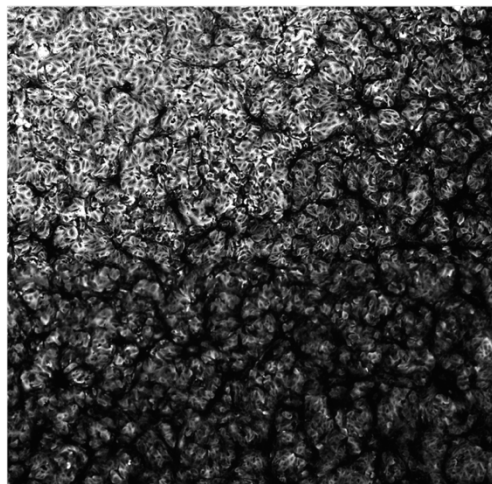

b.

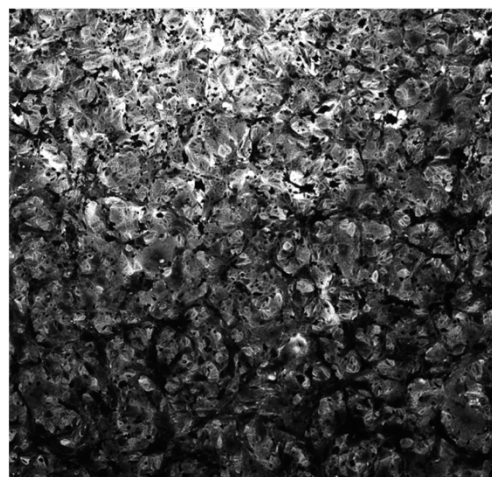

680

681

**Supplementary figure 1.**

*Comparison of SARS-CoV-2 evolution in vitro during passage in Vero and primary human airway cells*

a.

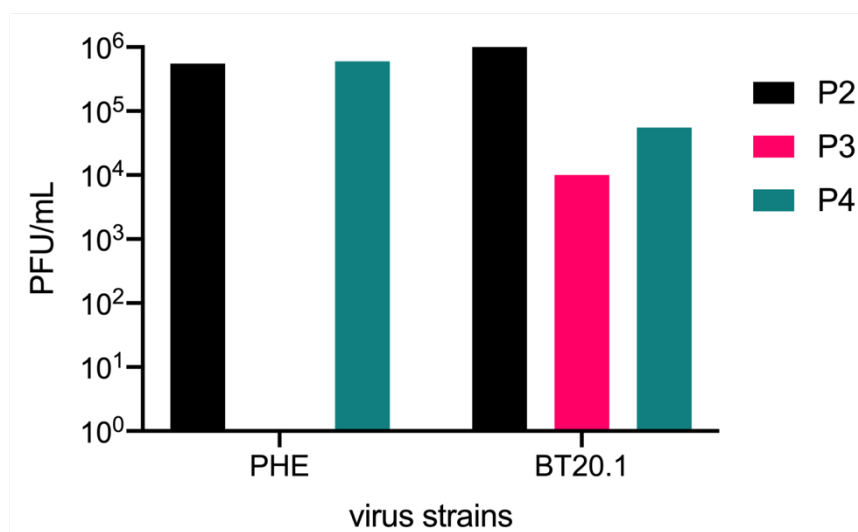

682

683

684

685

**Supplementary figure 2.**



*Comparison of SARS-CoV-2 evolution in vitro during passage in Vero and primary human airway cells*

686

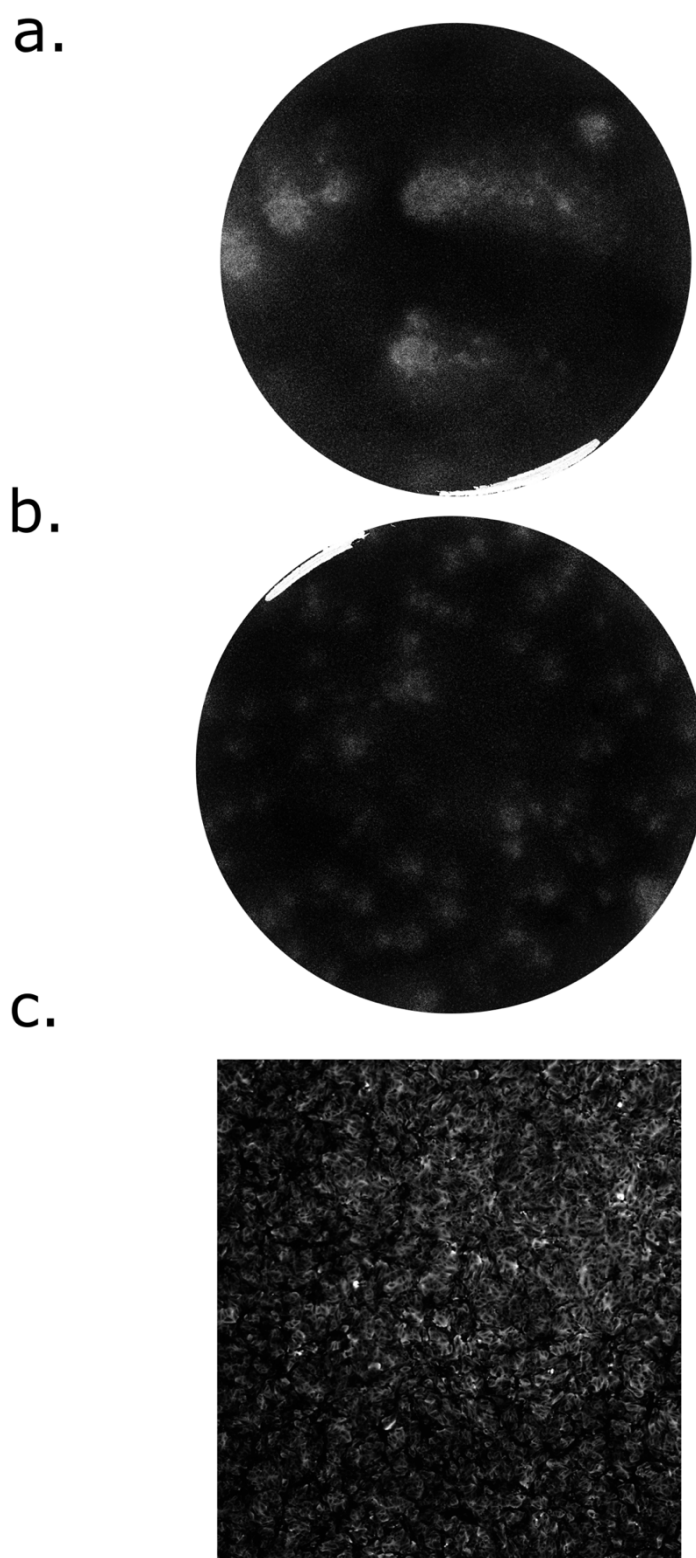

687

688

689

**Supplementary figure 3.**

*Comparison of SARS-CoV-2 evolution in vitro during passage in Vero and primary human airway cells*

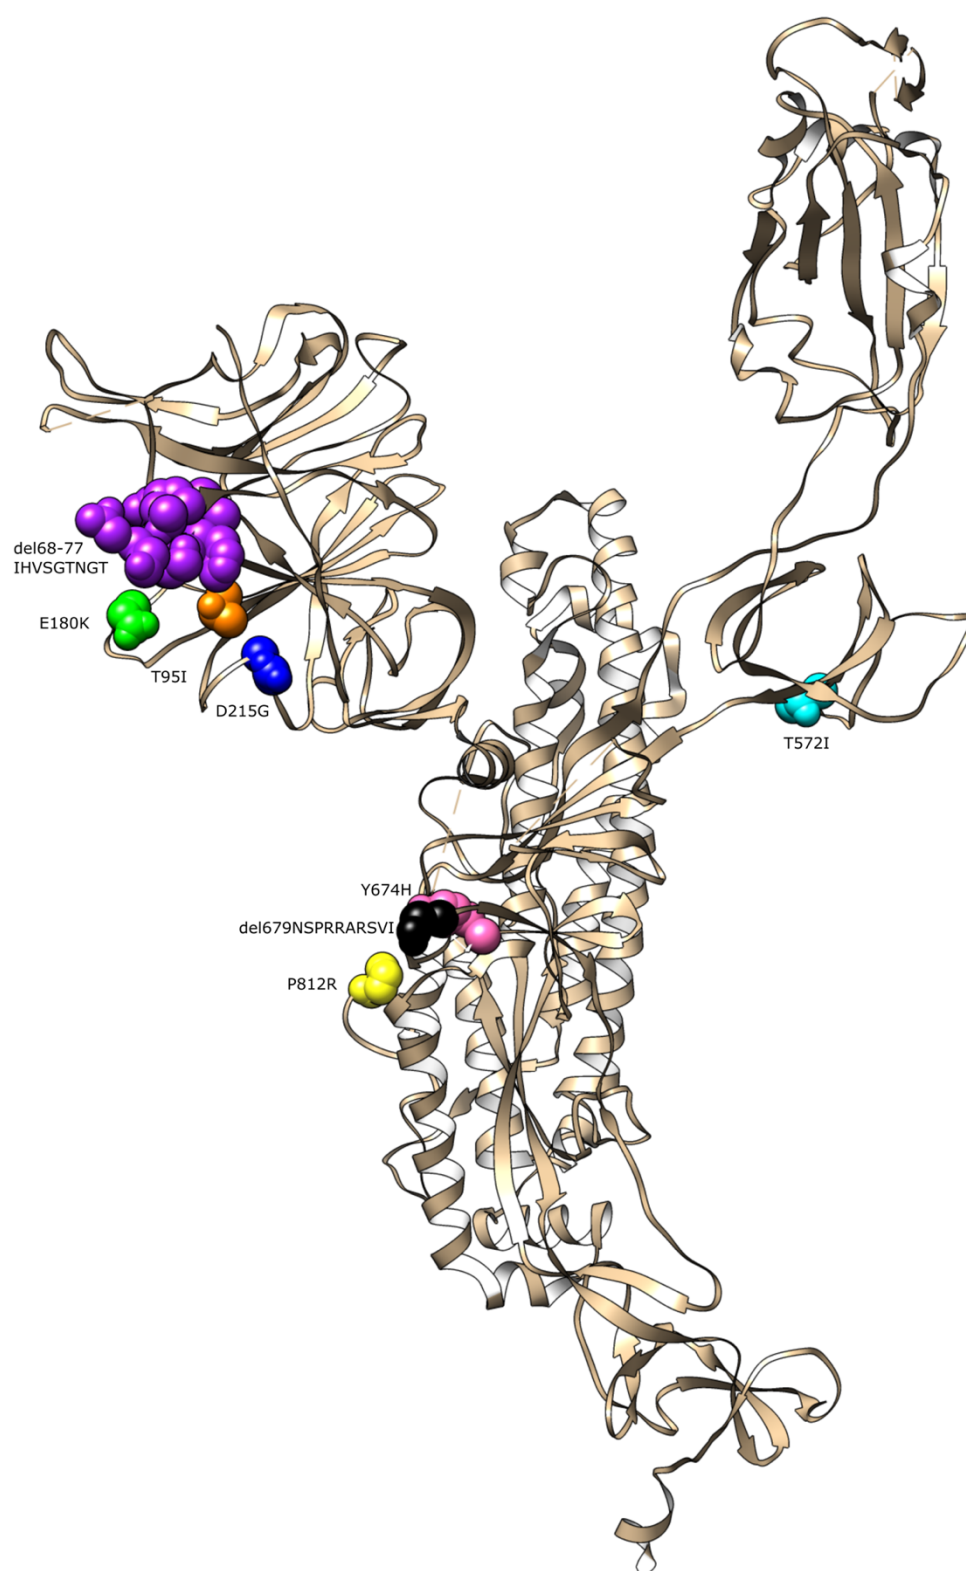

690

691

692

693

**Supplementary figure 4.**

*Comparison of SARS-CoV-2 evolution in vitro during passage in Vero and primary human airway cells*

694

## **Acknowledgements**

695 The authors would like to thank the following individuals and  
696 organisations for provision of critical reagents, and technical assistance:  
697 Public Health England and Professor Maria Zambon for the original SARS-  
698 CoV-2 England 02/20 isolate; Belfast Health and Social Care Trust for the  
699 original SARS-CoV-2 clinical material from which BT20.1 was derived;  
700 Professor Alain Kohl (MRC-University of Glasgow Centre for Virus  
701 Research) for the VeroE6 cells; and Dr Suzannah Rihn (MRC-University of  
702 Glasgow Centre for Virus Research) for the VeroE6 cells expressing  
703 human ACE2 and human TMPRSS2; QUB staff Mervyn McCaigue, Cathy  
704 Fenning, David Norwood, Nuala McCann, Paul Crowe and Zoe Hunter for  
705 their assistance in establishing and maintaining the QUB SARS-CoV-2  
706 BSL3 facility; and finally, Professor Jose Bengoechea for unwavering  
707 support for QUB virology at this critical time. We also wish to thank the  
708 QUB Genomics Core Technology Unit for their help with sequencing.  
709 Funding from UKRI/NIHR (MC\_PC\_19057) to UP, KM; PHA HSCNI R&D  
710 Division (COM/5613/20) to UP, KM, LB, CGGB, and GLC; and generous  
711 donations from the public to the Queen's University of Belfast Foundation  
712 was used for the study.

713

714

715

## Comparison of SARS-CoV-2 evolution in vitro during passage in Vero and primary human airway cells

716

### References

- 717 Boni, M. F., Lemey, P., Jiang, X., Lam, T. T. Y., Perry, B. W., Castoe, T. A., Rambaut, A.,  
718 & Robertson, D. L. (2020). Evolutionary origins of the SARS-CoV-2 sarbecovirus  
719 lineage responsible for the COVID-19 pandemic. *Nature Microbiology*, 5(11), 1408–  
720 1417. <https://doi.org/10.1038/s41564-020-0771-4>
- 721 Cevik, M., Bamford, C. G. G., & Ho, A. (2020). COVID-19 pandemic—a focused review  
722 for clinicians. In *Clinical Microbiology and Infection* (Vol. 26, Issue 7, pp. 842–847).  
723 Elsevier B.V. <https://doi.org/10.1016/j.cmi.2020.04.023>
- 724 Chi, X., Yan, R., Zhang, J., Zhang, G., Zhang, Y., Hao, M., Zhang, Z., Fan, P., Dong, Y.,  
725 Yang, Y., Chen, Z., Guo, Y., Zhang, J., Li, Y., Song, X., Chen, Y., Xia, L., Fu, L.,  
726 Hou, L., ... Chen, W. (2020). A neutralizing human antibody binds to the N-terminal  
727 domain of the Spike protein of SARS-CoV-2. *Science*, 369(6504), 650–655.  
728 <https://doi.org/10.1126/SCIENCE.ABC6952>
- 729 Davidson, A. D., Williamson, M. K., Lewis, S., Shoemark, D., Carroll, M. W., Heesom, K.  
730 J., Zambon, M., Ellis, J., Lewis, P. A., Hiscox, J. A., & Matthews, D. A. (2020).  
731 Characterisation of the transcriptome and proteome of SARS-CoV-2 reveals a cell  
732 passage induced in-frame deletion of the furin-like cleavage site from the spike  
733 glycoprotein. *Genome Medicine* 2020 12:1, 12(1), 1–15.  
734 <https://doi.org/10.1186/S13073-020-00763-0>
- 735 Dieterle, M. E., Haslwanter, D., Bortz, R. H., Wirchnianski, A. S., Lasso, G., Vergnolle,  
736 O., Abbasi, S. A., Fels, J. M., Laudermilch, E., Florez, C., Mengotto, A., Kimmel, D.,  
737 Malonis, R. J., Georgiev, G., Quiroz, J., Barnhill, J., Pirofski, L. anne, Daily, J. P.,  
738 Dye, J. M., ... Jangra, R. K. (2020). A Replication-Competent Vesicular Stomatitis  
739 Virus for Studies of SARS-CoV-2 Spike-Mediated Cell Entry and Its Inhibition. *Cell*  
740 *Host and Microbe*, 28(3), 486–496.e6. <https://doi.org/10.1016/j.chom.2020.06.020>
- 741 Afgan, E., Baker, D., Batut, B., van den Beek, M., Bouvier, D., Cech, M., Chilton, J.,  
742 Clements, D., Coraor, N., Gruning, B. A., Guerler, A., Hillman-Jackson, J.,  
743 Hiltmann, S., Jalili, V., Rasche, H., Soranzo, N., Goecks, J., Taylor, J., Nekrutenko,  
744 A., Blankenberg, D. (2018). The Galaxy platform for accessible, reproducible and  
745 collaborative biomedical analyses: 2018 update. *Nucleic Acids Research*, 46(W1),  
746 W537–W544. <https://doi.org/10.1093/NAR/GKY379>
- 747 Group, R. collaborative. (2021). Dexamethasone in Hospitalized Patients with Covid-19.  
748 *New England Journal of Medicine*, 384(8), 693–704.  
749 <https://doi.org/10.1056/nejmoa2021436>
- 750 Guo-Parke, H., Canning, P., Douglas, I., Villenave, R., Heaney, L. G., Coyle, P. V., Lyons,  
751 J. D., Shields, M. D., & Power, U. F. (2013). Relative Respiratory Syncytial Virus  
752 Cytopathogenesis in Upper and Lower Respiratory Tract Epithelium.  
753 <https://doi.org/10.1164/Rccm.201304-0750OC>, 188(7), 842–851.  
754 <https://doi.org/10.1164/RCCM.201304-0750OC>
- 755 Harvey, W. T., Carabelli, A. M., Jackson, B., Gupta, R. K., Thomson, E. C., Harrison, E.  
756 M., Ludden, C., Reeve, R., Rambaut, A., COVID-19 Genomics UK (COG-UK)  
757 Consortium, Peacock, S. J., & Robertson, D. L. (2021). SARS-CoV-2 variants, spike  
758 mutations and immune escape. *Nature Reviews. Microbiology*, 19(7), 409–424.  
759 <https://doi.org/10.1038/s41579-021-00573-0>
- 760 Hillen, H. S., Kovic, G., Farnung, L., Dienemann, C., Tegunov, D., & Cramer, P. (2020).  
761 Structure of replicating SARS-CoV-2 polymerase. *Nature*, 584(7819), 154–156.  
762 <https://doi.org/10.1038/s41586-020-2368-8>

## Comparison of SARS-CoV-2 evolution in vitro during passage in Vero and primary human airway cells

- 763 Hoffmann, M., Kleine-Weber, H., & Pöhlmann, S. (2020). A Multibasic Cleavage Site in  
764 the Spike Protein of SARS-CoV-2 Is Essential for Infection of Human Lung Cells.  
765 *Molecular Cell*, 78(4), 779-784.e5. <https://doi.org/10.1016/j.molcel.2020.04.022>
- 766 Holden, B., Quinney, A., Padfield, S., Morton, W., Coles, S., Manley, P., Wensley, A.,  
767 Hutchinson, C., Lillie, P. J., Duncan, C. J. A., Schmid, M. L., Li, A., Foster, K.,  
768 Anaraki, S., Dabrera, G., Zambon, M., Hughes, G. J., & Gent, M. (2020). COVID-19:  
769 public health management of the first two confirmed cases identified in the UK.  
770 *Epidemiology and Infection*, 148. <https://doi.org/10.1017/S0950268820001922>
- 771 Hou, Y. J., Okuda, K., Edwards, C. E., Martinez, D. R., Asakura, T., Dinno, K. H., Kato,  
772 T., Lee, R. E., Yount, B. L., Mascenik, T. M., Chen, G., Olivier, K. N., Ghio, A., Tse,  
773 L. V., Leist, S. R., Gralinski, L. E., Schäfer, A., Dang, H., Gilmore, R., ... Baric, R. S.  
774 (2020). SARS-CoV-2 Reverse Genetics Reveals a Variable Infection Gradient in the  
775 Respiratory Tract. *Cell*, 182(2), 429-446.e14.  
776 <https://doi.org/10.1016/j.cell.2020.05.042>
- 777 Emeny, J.M., & Morgan, M.J. (1979). Regulation of the interferon system: evidence that  
778 Vero cells have a genetic defect in interferon production. *The Journal of General*  
779 *Virology*, 43(1), 247-252. <https://doi.org/10.1099/0022-1317-43-1-247>
- 780 Johnson, B. A., Xie, X., Bailey, A. L., Kalveram, B., Lokugamage, K. G., Muruato, A.,  
781 Zou, J., Zhang, X., Juelich, T., Smith, J. K., Zhang, L., Bopp, N., Schindewolf, C.,  
782 Vu, M., Vanderheiden, A., Winkler, E. S., Swetnam, D., Plante, J. A., Aguilar, P., ...  
783 Menachery, V. D. (2021). Loss of furin cleavage site attenuates SARS-CoV-2  
784 pathogenesis. *Nature*, 591(7849), 293-299. [https://doi.org/10.1038/s41586-021-](https://doi.org/10.1038/s41586-021-03237-4)  
785 [03237-4](https://doi.org/10.1038/s41586-021-03237-4)
- 786 Klimstra, W. B., Tilston-Lunel, N. L., Nambulli, S., Boslett, J., Mcmillen, C. M., Gilliland,  
787 T., Dunn, M. D., Sun, C., Wheeler, S. E., Wells, A., Hartman, A. L., Mcelroy, A. K.,  
788 Reed, D. S., Rennick, L. J., & Duprex, W. P. (2020). SARS-CoV-2 growth, furin-  
789 cleavage-site adaptation and neutralization using serum from acutely infected  
790 hospitalized COVID-19 patients. *Journal of General Virology*, 101, 1156-1169.  
791 <https://doi.org/10.1099/jgv.0.001481>
- 792 Krammer, F. (2020). SARS-CoV-2 vaccines in development. In *Nature* (Vol. 586, Issue  
793 7830, pp. 516-527). Nature Research. <https://doi.org/10.1038/s41586-020-2798-3>
- 794 Lamers, M. M., Mykytyn, A. Z., Breugem, T. I., Wang, Y., Wu, D. C., Riesebosch, S., van  
795 den Doel, P. B., Schipper, D., Bestebroer, T., Wu, N. C., & Haagmans, B. L. (2021).  
796 Human airway cells prevent sars-cov-2 multibasic cleavage site cell culture  
797 adaptation. *ELife*, 10. <https://doi.org/10.7554/ELIFE.66815>
- 798 Lei, J., Kusov, Y., & Hilgenfeld, R. (2018). Nsp3 of coronaviruses: Structures and  
799 functions of a large multi-domain protein. In *Antiviral Research* (Vol. 149, pp. 58-  
800 74). Elsevier B.V. <https://doi.org/10.1016/j.antiviral.2017.11.001>
- 801 Lu, R., Zhao, X., Li, J., Niu, P., Yang, B., Wu, H., Wang, W., Song, H., Huang, B., Zhu,  
802 N., Bi, Y., Ma, X., Zhan, F., Wang, L., Hu, T., Zhou, H., Hu, Z., Zhou, W., Zhao, L.,  
803 ... Tan, W. (2020). Genomic characterisation and epidemiology of 2019 novel  
804 coronavirus: implications for virus origins and receptor binding. *The Lancet*,  
805 395(10224), 565-574. [https://doi.org/10.1016/S0140-6736\(20\)30251-8](https://doi.org/10.1016/S0140-6736(20)30251-8)
- 806 Maier, W., Bray, S., Beek, M. van den, Bouvier, D., Coraor, N., Miladi, M., Singh, B.,  
807 Argila, J. R. De, Baker, D., Roach, N., Gladman, S., Coppens, F., Martin, D. P.,  
808 Lonie, A., Grüning, B., Pond, S. L. K., & Nekrutenko, A. (2021). Freely accessible  
809 ready to use global infrastructure for SARS-CoV-2 monitoring. *BioRxiv*,  
810 2021.03.25.437046. <https://doi.org/10.1101/2021.03.25.437046>

## Comparison of SARS-CoV-2 evolution in vitro during passage in Vero and primary human airway cells

- 811 Matsuyama, S., Nao, N., Shirato, K., Kawase, M., Saito, S., Takayama, I., Nagata, N.,  
812 Sekizuka, T., Katoh, H., Kato, F., Sakata, M., Tahara, M., Kutsuna, S., Ohmagari,  
813 N., Kuroda, M., Suzuki, T., Kageyama, T., & Takeda, M. (2020). Enhanced isolation  
814 of SARS-CoV-2 by TMPRSS2-expressing cells. *Proceedings of the National Academy  
815 of Sciences*, 117(13), 7001–7003. <https://doi.org/10.1073/PNAS.2002589117>
- 816 Nemudryi, A., Nemudraia, A., Wiegand, T., Nichols, J., Snyder, D. T., Hedges, J. F.,  
817 Cicha, C., Lee, H., Vanderwood, K. K., Bimczok, D., Jutila, M. A., & Wiedenheft, B.  
818 (2021). SARS-CoV-2 genomic surveillance identifies naturally occurring truncation  
819 of ORF7a that limits immune suppression. *Cell Reports*, 35(9), 109197.  
820 <https://doi.org/10.1016/j.celrep.2021.109197>
- 821 Ogando, N. S., Dalebout, T. J., Zevenhoven-Dobbe, J. C., Limpens, R. W. A. L., van der  
822 Meer, Y., Caly, L., Druce, J., de Vries, J. J. C., Kikkert, M., Barcena, M., Sidorov, I.,  
823 & Snijder, E. J. (2020). SARS-coronavirus-2 replication in Vero E6 cells: Replication  
824 kinetics, rapid adaptation and cytopathology. *Journal of General Virology*, 101(9),  
825 925–940. <https://doi.org/10.1099/jgv.0.001453>
- 826 Peacock, T. P., Goldhill, D. H., Zhou, J., Baillon, L., Frise, R., Swann, O. C., Kugathasan,  
827 R., Penn, R., Brown, J. C., Sanchez-David, R. Y., Braga, L., Williamson, M. K.,  
828 Hassard, J. A., Staller, E., Hanley, B., Osborn, M., Giacca, M., Davidson, A. D.,  
829 Matthews, D. A., & Barclay, W. S. (2021). The furin cleavage site in the SARS-CoV-  
830 2 spike protein is required for transmission in ferrets. *Nature Microbiology*, 1–11.  
831 <https://doi.org/10.1038/s41564-021-00908-w>
- 832 Pohl, M. O., Busnadiego, I., Kufner, V., Glas, I., Karakus, U., Schmutz, S., Zaheri, M.,  
833 Abela, I., Trkola, A., Huber, M., Stertz, S., & Hale, B. G. (2021). SARS-CoV-2  
834 variants reveal features critical for replication in primary human cells. *PLOS Biology*,  
835 19(3), e3001006. <https://doi.org/10.1371/journal.pbio.3001006>
- 836 Ramirez, S., Fernandez-Antunez, C., Galli, A., Underwood, A., Pham, L. V., Ryberg, L.  
837 A., Feng, S., Pedersen, M. S., Mikkelsen, L. S., Belouzard, S., Dubuisson, J., Sølund,  
838 C., Weis, N., Gottwein, J. M., Fahnøe, U., & Bukh, J. (2021). Overcoming culture  
839 restriction for SARS-CoV-2 in human cells facilitates the screening of compounds  
840 inhibiting viral replication. *Antimicrobial Agents and Chemotherapy*, 65(7).  
841 <https://doi.org/10.1128/aac.00097-21>
- 842 Rihn, S. J., Merits, A., Bakshi, S., Turnbull, M. L., Wickenhagen, A., Alexander, A. J. T.,  
843 Baillie, C., Brennan, B., Brown, F., Brunker, K., Bryden, S. R., Burness, K. A.,  
844 Carmichael, S., Cole, S. J., Cowton, V. M., Davies, P., Davis, C., Lorenzo, G. De,  
845 Donald, C. L., ... Mahalingam, S. (2021). A plasmid DNA-launched SARS-CoV-2  
846 reverse genetics system and coronavirus toolkit for COVID-19 research. *PLOS  
847 Biology*, 19(2), e3001091. <https://doi.org/10.1371/JOURNAL.PBIO.3001091>
- 848 Shang, J., Ye, G., Shi, K., Wan, Y., Luo, C., Aihara, H., Geng, Q., Auerbach, A., & Li, F.  
849 (2020). Structural basis of receptor recognition by SARS-CoV-2. *Nature*, 581(7807),  
850 221–224. <https://doi.org/10.1038/s41586-020-2179-y>
- 851 Tyson, J. R., James, P., Stoddart, D., Sparks, N., Wickenhagen, A., Hall, G., Choi, J. H.,  
852 Lapointe, H., Kamelian, K., Smith, A. D., Prystajeky, N., Goodfellow, I., Wilson, S.  
853 J., Harrigan, R., Snutch, T. P., Loman, N. J., & Quick, J. (2020). Improvements to  
854 the ARTIC multiplex PCR method for SARS-CoV-2 genome sequencing using  
855 nanopore. *BioRxiv*, 3, 2020.09.04.283077.  
856 <https://doi.org/10.1101/2020.09.04.283077>
- 857 Villenave, R., Thavagnanam, S., Sarlang, S., Parker, J., Douglas, I., Skibinski, G.,  
858 Heaney, L. G., McKaigue, J. P., Coyle, P. V, Shields, M. D., & Power, U. F. (2012). In  
859 vitro modeling of respiratory syncytial virus infection of pediatric bronchial

## *Comparison of SARS-CoV-2 evolution in vitro during passage in Vero and primary human airway cells*

- 860 epithelium, the primary target of infection in vivo. *Proceedings of the National*  
861 *Academy of Sciences of the United States of America*, 1–6.  
862 <https://doi.org/10.1073/pnas.1110203109>
- 863 Wang, Z., Yang, B., Li, Q., Wen, L., & Zhang, R. (2020). Clinical Features of 69 Cases  
864 with Coronavirus Disease 2019 in Wuhan, China. *Clinical Infectious Diseases*.  
865 <https://doi.org/10.1093/cid/ciaa272>
- 866 Wu, F., Zhao, S., Yu, B., Chen, Y.-M., Wang, W., Song, Z.-G., Hu, Y., Tao, Z.-W., Tian,  
867 J.-H., Pei, Y.-Y., Yuan, M.-L., Zhang, Y.-L., Dai, F.-H., Liu, Y., Wang, Q.-M., Zheng,  
868 J.-J., Xu, L., Holmes, E. C., & Zhang, Y.-Z. (2020). A new coronavirus associated  
869 with human respiratory disease in China. *Nature*, 579(7798), 265–269.  
870 <https://doi.org/10.1038/s41586-020-2008-3>
- 871
- 872
